1 **Title page**

2

3 **The cycad coralloid root contains a diverse endophytic bacterial community with**  
4 **novel biosynthetic gene clusters unique to its microbiome**

5

6 Pablo Cruz-Morales<sup>1,2</sup>, Antonio Corona-Gómez<sup>2</sup>, Nelly Selem-Mójica<sup>1</sup>, Miguel A.  
7 Perez-Farrera<sup>3</sup>, Francisco Barona-Gómez<sup>1</sup>, Angélica Cibrián-Jaramillo<sup>2,\*</sup>

8

9 <sup>1</sup> Evolution of Metabolic Diversity and <sup>2</sup> Ecological and Evolutionary Genomics  
10 Laboratories, Unidad de Genómica Avanzada (Langebio), Cinvestav-IPN, Km 9.6  
11 Libramiento Norte, Carretera Irapuato-León, CP 36821, Irapuato, Guanajuato, México

12 <sup>3</sup> Escuela de Biología, Universidad de Ciencias y Artes del Estado de Chiapas,  
13 Libramiento Norte Poniente s/n, Col. Lajas-Maciel, CP 29029, Tuxtla Gutiérrez,  
14 Chiapas, México.

15

16 Pablo Cruz Morales: cruzmoralesp@gmail.com

17 José A. Corona-Gómez: jose.corona@cinvestav.mx

18 Nelly Selem-Mojica: nselem84@gmail.com

19 Miguel Perez-Farrera: miguel.perez@unicach.mx

20 Francisco Barona-Gómez: francisco.barona@cinvestav.mx

21

22 \*Angélica Cibrián-Jaramillo: angelica.cibrian@cinvestav.mx

23 Corresponding author

## 24 **Keywords**

25 Cycad, *Dioon*, coralloid root, microbiome, sub-community co-culture, cyanobacteria,  
26 *Nostoc*, specialized metabolites.

27

## 28 **Abstract**

29 Cycads are the only gymnosperms and ancient seed plants that have evolved a  
30 specialized coralloid root to host endophytic bacteria. There are no studies exploring the  
31 taxonomic, phylogenetic and functional diversity of the bacterial endophyte microbiome  
32 of this 300 million-year old symbiosis. We provide a genomic characterization of the  
33 cycad coralloid root microbiome of the Mexican cycad *Dioon merolae* collected from  
34 their natural environment. We employed a co-culture-based metagenomics experimental  
35 strategy jointly with phylogenomic analyses to reveal both predominant and rare  
36 bacteria, to capture biological diversity, and also the presence of biosynthetic gene  
37 clusters associated with specialized metabolites. Most taxa were identified as diazotroph  
38 plant endophytes that include undescribed taxa and at least 27 genera belonging to 17  
39 bacterial families in addition to Cyanobacteria. Three cyanobacteria genomes obtained  
40 from our samples formed a monophyletic group, suggesting a level of specialization  
41 characteristic of co-evolved symbiotic relationships. This contrasted with our finding of  
42 their large genome sizes and their broad biosynthetic potential, distinctive of facultative  
43 endosymbionts of complex alternative lifestyles. Nine out of 23 novel biosynthetic gene  
44 clusters identified after detailed genome mining are specific to these coralloid root  
45 endophytes, including a NRPS system predicted to direct the synthesis of nostoginins,  
46 protease inhibitors whose biosynthetic pathway remains to be discovered. Combined,  
47 our results show that the highly diverse taxonomic composition of the coralloid root and

48 its biosynthetic repertoire, correlate more with a degree of specificity to the cycad plant  
49 host than to other closely related plant endosymbionts or to the environment. We  
50 support the growing notion that plant-bacteria relations occur under heavy influence of  
51 chemical and genomic interactions, and we add to the understanding of the evolution of  
52 cycad-bacteria microbiome, with a bearing on bioprospecting of natural products for  
53 drug discovery and other applications.

54

## 55 **Background**

56 Cycads (Cycadales) are the only early seed plants and the only gymnosperms that  
57 develop coralloid roots, a specialized root dichotomous and coral-like in appearance  
58 typically growing above ground, which acquires and maintains bacteria [1] (**Fig. 1**). The  
59 coralloid root is present in all cycad lineages, likely due to its adaptive value as a  
60 significant source of fixed nitrogen for the plant [2]. In natural habitats coralloid roots  
61 appear in the most vulnerable early life stages [3], or as adults in habitats with poor or  
62 inaccessible nutrients [4] such as sand dunes, sclerophyll forests, steep rock outcrops  
63 with high exposure to salt, and lowland forests with recurrent fires. The cycad coralloid  
64 root is probably a key trait that enabled cycads to thrive and adapt to novel  
65 environments for millions of years.

66 Coralloid root endophytes have been studied since the 19<sup>th</sup> century ([5] and  
67 references therein). However, most studies have focused on resolving the biology or  
68 taxonomy of the Cyanobacteria, and most samples have been collected from botanic  
69 garden collections or grown in greenhouses, typically outside of the cycad host natural  
70 range [6-12]. Anatomical studies have shown the presence of mucilaginous or protein-  
71 rich material that hosts other unidentified bacterial groups [5, 13, 14], with only a few

72 specific bacterial taxa suggested [15-19]. Studies testing for the specificity of  
73 cyanobacteria and the cycad host have been conducted in plants collected outside of  
74 their native distribution, with contrasting results regarding the specialization of coralloid  
75 root symbionts [5, 15, 20]. Moreover, the handful of field-based studies from wild  
76 cycad populations, focused only on cyanobacteria identified with molecular markers  
77 [11, 21], and show that diversity ranges from a single cyanobacteria strain inside an  
78 individual root, to diverse species complexes among roots, and within and among  
79 various cycad genera. Studies on the origin and transmission of bacterial endophytes are  
80 also inconclusive [12], thus the degree of cycad-bacteria co-evolution in this symbiotic  
81 system remains a mystery.

82 In addition to nitrogen fixation there have been suggestions of additional  
83 -unknown- roles for the coralloid root, but there is no clear evidence of its broader  
84 function to date [5]. Likewise, various chemical, physical and physiological  
85 mechanisms appear to regulate the cycad-bacteria interaction [22, 23], but no genes  
86 involved in novel specialized metabolite production in the light of the symbiosis have  
87 been identified. In all, the taxonomic composition and the function of the cycad  
88 coralloid root microbiome, defined as the bacteria living inside this specialized organ  
89 plus their genes and products, remains undescribed almost entirely. What is more, the  
90 evolutionary history of the microbiome within a *ca.*300 million-year-old symbiotic  
91 plant-bacteria relationship is still incipiently explored.

92 Our goal in this study is to investigate the microbiome of the coralloid roots of  
93 *Dioon merolae* [24]. *Dioon merolae* is a long-lived, entomophilous, dioecious, and  
94 arborescent cycad native to Mexico [25]. We collected coralloid root samples from wild  
95 populations in two different habitats from its natural range, currently distributed in

96 moderate population sizes of a few hundreds of individuals throughout Chiapas and  
97 Oaxaca in the south of Mexico [25]. The availability of whole-genome and  
98 metagenomic sequencing enabled us to provide insights on the diversity and  
99 phylogenetic distribution of its endophytes and their cycad-related specialized  
100 functions.

101         The presence of uniquely specialized metabolites in the cycad coralloid root  
102 microbiome was of particular interest to us because they may be a result of co-evolution  
103 between the cycad host and the endophyte bacterial community. Bacteria have dynamic  
104 genomic diversity and the capacity to synthesize specialized metabolites with  
105 overwhelming chemical diversity that are produced to cope with biotic and abiotic  
106 pressures [26]. Bacteria codify specialized metabolites in rapidly evolving genetic units  
107 called biosynthetic gene clusters (BGCs) of about 25-40 Kbp. The ability to capture and  
108 retain bacteria in the coralloid root could provide a mechanism for cycads to adapt  
109 quickly to local conditions by increasing their specialized metabolite repertoire, in a  
110 known host and environment. From a more anthropocentric view, conserved BGCs of  
111 the coralloid root bacterial endophytes may also be of interest as a source of novel  
112 natural products for drug discovery.

113         To overcome technical difficulties in characterizing the breadth of microbial  
114 diversity in environmental samples, we used an enrichment co-culture strategy of sub-  
115 communities obtained from the original sample [27]. We employed complementing  
116 microbiological, genomic and metagenomic sequencing, and phylogenomic approaches  
117 to characterize the coralloid microbiome's taxonomic diversity and gain insights into its  
118 function. Our study is the first to characterize the taxonomy and function of the

119 coralloid root beyond cyanobacteria, providing a glimpse into the evolutionary history  
120 of the cycad-bacteria coralloid root system.

121

## 122 **Methods**

123 **Overall strategy.** We used a combined co-culture, metagenomics and phylogenomic  
124 strategy to detect and measure taxonomic diversity, phylogenetic relationships and  
125 biosynthetic potential in the endophytes of the cycad coralloid root, as previously  
126 described under the term of EcoMining [27] (**Fig. 1**). In this approach, we grew and  
127 isolated bacteria from environmental samples using a diverse set of media that aim to  
128 capture all possible cultivable bacterial diversity ( $t_0$ ). Simultaneously, we enriched the  
129 same samples in co-cultures grown under specific conditions for cyanobacteria using  
130 BG11 media. In addition to this autotrophic bacterial group, this approach captures  
131 other bacterial groups that have interactions with cyanobacteria, present in the original  
132 sample at low titers. We allowed the co-culture to grow over time and sampled it after  
133 one month ( $t_1$ ) and at the end of a year ( $t_2$ ) to capture organisms that depend on other  
134 bacteria of the community to grow. We isolated axenic bacteria ( $t_0$  and  $t_1$ ) and sub-  
135 communities in co-cultures ( $t_1$  and  $t_2$ ), and reconstructed phylogenetic relationships and  
136 assessed taxonomic diversity, using 16S rRNA and metagenomic OTUs (mOTUs) data,  
137 respectively. Furthermore, genomes of isolated endophytes were obtained and  
138 thoroughly mined together with metagenomes for BGCs potentially directing the  
139 synthesis of specialized metabolites.

140

141 **Field collections.** We sampled coralloid roots from two wild cycad populations  
142 previously reported [25]. In March of 2014 we sampled from two sites in deciduous

143 tropical forests, at Jiquipilas, Mexico (JP or dry; Lat 16° 37' 26.87''N, Long 93° 34'  
144 34.64'' O) at 560m above mean sea level, with an average annual precipitation of 320  
145 mm and average annual temperature of 18 °C; and Raymundo Flores Mexico (RF or  
146 humid; Lat 16° 3' 26.75''N, Long 93° 35' 55.26'' O) at 900m above mean sea level,  
147 with 2500 mm and 25°C annual average precipitation and temperature, respectively. In  
148 some cycad plants, coralloid roots were easily visible aboveground, while in others we  
149 dug to about 30 cm around the main root until coralloid roots were found. In a  
150 population of approximately 40 individuals, we generally found 10-12 coralloid roots,  
151 in almost exclusively juvenile plants. A total of 10 coralloid apogeotropic roots were cut  
152 from 10 plants, cleaned with sterile distilled water to remove soil excess, placed in 15  
153 ml sterile Falcon tubes (Beckton Dickinson), and transported immediately to the  
154 laboratory at room temperature.

155

156 ***Coralloid root processing.*** We focused our effort on three samples of three individuals  
157 with the largest coralloid roots, in each of the two sites, Jiquipilas (JP or dry) and  
158 Raymundo Flores (RF or humid) for a total of six coralloid root samples (JP1, JP2, JP6  
159 and RF1, RF3 and RF9), and stored the remaining samples at -80 °C for subsequent  
160 studies. When DNA samples from these individuals were pooled for sequencing  
161 purposes they are referred to as JPPOOL or RFPOOL, respectively. We treated the  
162 coralloid root in a laminar flow hood (Nuair Model Nu-126-400) with a series of  
163 washes to remove exogenous bacteria from the rhizosphere or other contamination  
164 sources. Each root was introduced in 50 ml sterile Falcon tubes containing 10 ml of  
165 each of the following solutions, and gently stirred for: three minutes in hydrogen  
166 peroxide (H<sub>2</sub>O<sub>2</sub>), seven minutes in 70% ethanol, 30 seconds in sterile dd-MilliQ water,

167 four minutes in 6% sodium hypochlorite (NaClO), and three one-minute washes in  
168 sterile dd-MilliQ water. After this procedure, we plated out water from the last wash in  
169 Petri dishes containing the five media described below. Lack of growth in the last wash  
170 was considered a negative control, and only samples complying with this criterion were  
171 used for endophyte isolation. We undertook two approaches to bacterial isolation (Fig.  
172 1): sampling without enrichment directly from field samples ( $t0$ ), and sampling from the  
173 enriched co-cultures ( $t1$ ), as described in the following sections.

174

175 **Bacterial isolation.** To isolate bacteria from field samples before ( $t0$ ) and after ( $t1$ )  
176 enrichment, macerated roots or co-culture broth were used as inoculant, respectively.  
177 Loss of some bacterial groups that were present in the sample collected from the  
178 environment ( $t0$ ) is expected. However, after enrichment ( $t1$ ) we recover bacteria that  
179 were initially present in low abundances and required time to grow, and that did so as a  
180 response to the community nutritional interactions (e.g. amino acids derived from the  
181 process of fixing nitrogen) [27]. Roots were macerated in 10 ml of sterile water using a  
182 pestle and mortar until plant material was completely disintegrated. We used 100  $\mu$ l  
183 from the root macerate to directly isolate bacteria in Petri dishes containing six different  
184 media, chosen to selectively (oligotrophic, four media) or non-selectively (eutrophic,  
185 two media) recover bacterial diversity as much as possible. The four selective media  
186 used were chosen to target bacterial groups that are known to be either plant endophytes  
187 or rhizosphere bacteria, and included: 1) *Caulobacter* medium (glucose: 1 g/L; peptone:  
188 1g/L; yeast extract: 1.5 g/L; trace metals solution: 1 mL/L; and 10 g/L of agar for solid  
189 medium) [28]; 2) *Rhizobium* medium (mannitol: 10 g/L; dipotassium phosphate: 0.5  
190 g/L; magnesium sulfate: 0.2 g/L; yeast extract: 1 g/L; sodium chloride: 0.1 g/L; final pH



191 6.8; and 20 g/L for solid medium [29, 30]; 3) ISP4, for isolation of actinomycetes  
192 (starch: 10.0 g/L; dipotassium phosphate: 1 g/L; magnesium sulfate: 1 g/L; sodium  
193 chloride: 1 g/L; ammonium sulfate: 2 g/L; calcium carbonate: 2 g/L; ferrous sulfate: 1  
194 mg/L; magnesium chloride: 1 mg/L; zinc sulfate: 1 mg/L; final pH 7.0; and 20 g/L for  
195 solid media) [31]; 4) BG-11, a cyanobacteria medium (sodium nitrate: 1.5 g/L;  
196 dipotassium phosphate: 0.04 g/L; magnesium sulfate: 0.075 g/L; calcium chloride:  
197 0.036 g/L; citric acid: 0.006 g/L; ferric ammonium citrate: 0.006 g/L; EDTA (disodium  
198 salt): 0.001 g/L; sodium carbonate: 0.02 g/L; final pH 7.1 and agar solid media 10.0  
199 gr/L [32]. The non-selective, rich media, included: 5) Nutrient Broth (BD Bioxon,  
200 Mexico); and 6) As in *Caulobacter* medium, but supplemented with mannitol  
201 (*Caulobacter* + mannitol medium): 1g/L, with aim of providing a carbon source closer  
202 to that hypothetically encountered inside the cycad root.

203

204 ***Bacterial sub-communities cultivation.*** We took 100 µl of the macerated roots that  
205 passed the negative growth controls after the final washing step (i.e. samples JP1, JP2,  
206 JP6 and RF1, RF3 and RF9, which also lead to JPPOOL and RFPOOL samples as  
207 described next), and inoculated 100 ml of media in 250 ml flasks. The remaining  
208 macerated roots not used for fresh cultures were kept as frozen stocks for future studies  
209 (-80 °C in 10% glycerol), although community viability after freezing is expected to  
210 diminish over time. We used one non-selective eutrophic medium, i.e. enriched  
211 *Caulobacter* + mannitol medium (medium No. 6), which we expected to favor growth  
212 of the majority of the generalist taxa in the root bacterial community; and one selective  
213 oligotrophic medium, i.e. BG11 (medium No. 4). This medium lacks a carbon source  
214 but contains a limited amount of inorganic nitrogen. BG11 cyanobacteria-centric co-

215 cultures were grown for up to one year with constant stirring, with cycles of 16/8 hours  
216 of light/darkness per day. Eutrophic cultures were sampled after 72 hours, and their  
217 DNA extracts pooled (JPPOOL and RFPOOL), whereas sampling of the oligotrophic  
218 co-cultures was done after 1 month ( $t1$ ) and 1 year ( $t2$ ), and treated independently.  
219 Moreover, bacterial isolates were only obtained for the former, whereas for both time  
220 points shotgun metagenomics were obtained, allowing for genome mining of  
221 specialized metabolites.

222

223 ***Genomics and shotgun metagenomics.*** To sequence metagenomes from enriched sub-  
224 community co-cultures, we collected their biomass by centrifugation (6000 RPM during  
225 15 minutes) and used for DNA extraction using a CTAB-phenol chloroform standard  
226 protocol. Isolate 106C, obtained from sample JP6, and isolate T09, obtained from  
227 coralloid roots of *Dioon caputoi* from an unrelated environment (Xeric shrubland,  
228 Tehuacan valley, Mexico), were both grown on BG11 plates. Genomic DNA from these  
229 cultures was obtained with exactly the same CTAB-phenol chloroform protocol.  
230 Genomic and metagenomic DNA samples were processed with truseq nano kit Q28 and  
231 were sequenced at Langebio, Cinvestav (Irapuato, Mexico) using the MiSeq Illumina  
232 platform in the 2X250 Paired end reads format (T09) and the NextSeq mid output  
233 2X150 paired end read format (106C y RF3-1yr). The reads for each library were  
234 filtered with fastQ and trimmed using Trimomatic version 0.32 [33], and assembled  
235 using Velvet 1.2.10 [34] with different  $k$ -mers: the assemblies with the largest length  
236 and the smaller number of contigs were selected and annotated using RAST [35]. The  
237 assembly of “*Nostoc* sp. 1031Ymg” was obtained from metagenomic reads of co-  
238 culture RF3-  $t2$ . These reads were filtered by mapping them against the assembly of

239 *Nostoc* sp. 106C with BWA [36]. The resulting reads were assembled with Velvet using  
240 different *k*-mers: the assemblies with the largest length and the smaller number of  
241 contigs were selected and annotated using RAST [35]. JPPOOL and RFPOOL  
242 metagenomes from eutrophic conditions were obtained after pooling DNA samples  
243 from JP and RF, respectively, and treated as individual samples.

244

245 ***Taxonomic diversity.*** We first estimated taxonomic diversity using the 16S rRNA gene  
246 as a marker for our entire bacterial endophyte collection. PCR products of 1.4 Kbp in  
247 length, obtained using the F27 and R1492 primers [37], were obtained and sequenced  
248 using the Sanger method (ABI 3730xl). The taxonomic identification was made using  
249 Blastn with an initial cut-off e-value of 1e-5 against the SILVA database [38]. We used  
250 the phylogenetic position of the top 10 hits from each search without duplicated  
251 matches, to determine both taxonomic diversity and phylogenetic relationships.

252 To measure the taxonomic composition of the sub-community co-cultures from  
253 metagenomes, we contrasted different methods of OTU identification and abundance  
254 that we presumed would be able to capture the breadth of taxa in our samples. We were  
255 particularly concerned with capturing cyanobacteria diversity. First, we used mOTUS, a  
256 method based on single-copy marker genes obtained from metagenomes and reference  
257 genomes [39]. We trimmed and filtered the Illumina reads and kept those with a  
258 minimum cutoff identity of 93%, and all other parameters as default. Taxa abundance  
259 from mOTUs, defined as the percentage of the genera present in each sample, was  
260 calculated with the Vegan v2.3-5 package in R [40]. We estimated the efficiency of our  
261 sequencing effort with respect to the total possible taxa per metagenome using the  
262 rarefaction method based on [41]. To do this we calculated the proportional number of

263 sequences for each metagenome, in which the richness of mOTUs is sub-sampled  
264 randomly from the entire community.

265         Second, we used Kraken, a taxonomic analyzer to assign taxonomic labels to  
266 metagenomic DNA sequences based on exact alignment of *k*-mers [42]. Kraken is a  
267 taxonomic analyzer based on assigned taxonomy to short DNA reads, using a reference  
268 data base to identify alignments and the lowest common ancestor [42]. We implemented  
269 Kraken using the pipeline available at <http://ccb.jhu.edu/software/kraken/> in our cluster  
270 Mazorka with five nodes each with 2 Intel Xeon E5-2650 @ 2.30GHz CPUs  
271 (“Haswell”, 10 cores/socket, 20 cores/node) and 768 GB of RAM memory. We used  
272 Kraken-build to make a standard Kraken database using NCBI taxonomic information  
273 for all bacteria, as well as the bacterial, archaeal and viral complete genomes in RefSeq  
274 (October 2016). This database contains a mapping of every *k*-mer in Kraken's genomic  
275 library to the lowest common ancestor in a taxonomic tree of all genomes that contain  
276 that *k*-mer. We summarized the results in genera-level tables for each metagenome and  
277 filtered taxonomy hits that had one or more reads assigned directly to a taxon.

278         Our third method to estimate metagenomic taxonomic diversity was MG-RAST  
279 [43], which we used to annotate each metagenome at the level of genera using the  
280 default parameters, and selected only taxa that had at least 10,000 number of reliable  
281 hits. Each taxonomic annotation indicates the percentage of reads with predicted  
282 proteins and ribosomal RNA genes annotated to the indicated taxonomic level.

283         To visualize shared taxa among metagenomes, and their abundance, we used  
284 Cytoscape v3.4.0 [44], where each node and its size represent the abundance of an  
285 OTU, and lines represent shared taxa between metagenomes. The network was made by  
286 an interaction matrix, where each of the OTUs that had more than 14 readings assigned

287 directly by Kraken identification, was linked to the metagenome from which it came.  
288 Identified nodes were manually ordered to prevent visual overlap. We also calculated  
289 the Shannon-Weaver  $H'$  and Simpson  $L$  indices for OTUs from all three methods using  
290 the Vegan v2.3-5 package in R [40].

291

292 ***Reconstruction of phylogenetic relationships.*** We aligned annotated 16S rRNA  
293 sequences trimmed to 1.1 Kbp, using MUSCLE v3.8.31 with default parameters [45].  
294 This matrix was used for phylogenetic reconstruction using MrBayes v3.2 [46] with a  
295 gamma distribution type range with 1,000,000 generations. ModelTest [47] showed that  
296 Kimura 2 parameters was the best substitution model. To explore major clades in more  
297 detail, we estimated individual phylogenies for each of the genera in our main tree and  
298 represented them graphically. To do this we first recovered a tree by generating a  
299 consensus sequence from all genera within each clade in MUSCLE v3.8.31 with default  
300 parameters [45]. Then a Bayesian phylogeny with a gamma distribution and a million  
301 generations (additional generations did not change our results) was reconstructed using  
302 MrBayes v3.2 for each individual genus dataset. The resulting trees were edited and  
303 sorted with Environment for Tree Exploration Toolkit v3.0.0b35 [48] in Python v2.7.6.

304 To construct a complete phylogeny of cyanobacteria strains we used the amino  
305 acid sequences of GyrB and RpoB as markers [49]. However, their corresponding  
306 phylogenies lacked support and resolution even after concatenation, thus we included  
307 into the matrix orthologs of the Carbamoyl-phosphate synthase large subunit (CPS),  
308 Phenylalanine-tRNA ligase beta subunit (PheT) and the Trigger factor (Tig). Sequences  
309 of RpoB, GyrB, CPS, PheT and Tig were extracted from an in-house database of  
310 cyanobacterial genomes obtained from GenBank, and annotated using RAST [35]. The

311 sequences were obtained using Blast with a cut-off e-value of 1e-50 and a bitscore of  
312 200. Each set of sequences were aligned using MUSCLE v3.8.31 with default  
313 parameters [45], and trimmed manually. Independent phylogenies were performed for  
314 each marker to filter out redundant and divergent sequences. The sequences that passed  
315 this filter were included in the final array, which included the organisms for which all  
316 five markers could be retrieved. The final matrix included 289 taxa, with 3617  
317 aminoacids, and it was used to reconstruct a tree with MrBayes, using a mixed  
318 substitution model based on posterior probabilities (aamodel[Wag]1.000) for proteins  
319 for a 10 million generations. Convergence of runs was reached after 1 million  
320 generations.

321 Finally, a high resolution cyanobacteria phylogenetic tree was constructed  
322 using a set of 198 conserved proteins (Additional file 1: **Table S1**), which represent the  
323 core of a set of 77 cyanobacterial genomes (Additional file 2: **Table S2**) including our  
324 two isolates (T09 and 106C) and the RF31YmG assembly; and *Fischerella* sp. NIES  
325 3754 and *Hassallia byssoidea* VB512170 as outgroups. We extracted and assembled the  
326 cyanobacterial genomes from the metagenome RF3-T2. To obtain the RF31YmG  
327 genome, contigs from the 106C assembly were used as reference to match and extract  
328 reads from the RF3-t2 metagenome using BWA [36]. The obtained reads were  
329 assembled using Velvet with the extension columbus with different *k*-mers. The best  
330 assembly, considered as the largest assembly with the lower number of contigs, was  
331 selected and annotated with RAST as previously. The core genome was obtained using  
332 an in-house script available at <https://github.com/nselem/EvoDivMet/wiki>, which will  
333 be reported elsewhere in due course. Then, a set of 198 core proteins was selected from  
334 only 33 Nostocales genomes in our database to construct the final concatenated matrix,

335 which included 45477 amino acids. We used this matrix to reconstruct a phylogeny  
336 using MrBayes v3.2 with a mixed model (not partitioned), for a million generations.  
337  
338 **Genome mining for BGCs.** To identify BGCs potentially directing the synthesis of  
339 specialized metabolites among selected cyanobacteria, we annotated the genome of the  
340 isolate 106C with antiSMASH [50]. The predicted BGCs were used as a reference for  
341 further searches among the selected genomes. For this purpose we used our in-house  
342 pipeline, called CORASON (available at <https://github.com/nselem/EvoDivMet/wiki>),  
343 which will be reported elsewhere in due course. CORASON allows for the  
344 identification of conserved and unique BGCs among the selected genomes. Prediction  
345 of the chemical structures of the putative specialized metabolites associated with these  
346 BGCs was done after domain identification and specificity prediction, mainly of  
347 adenylation and acyl transfer domains, with NRPS-PKS server [51], PRISM [52] and  
348 antiSMASH [50].

349

## 350 **Results**

351 Our experimental strategy (**Fig. 1**) to characterize the taxonomic diversity of the  
352 coralloid root endophytic microbiome led to hundreds of bacterial isolates obtained  
353 directly from the original sample (*t0*); and from enriched sub-communities in  
354 oligotrophic (BG11) medium (*t1*), aimed at promoting interactions between members of  
355 the coralloid root community. Individual markers and genomic sequences obtained from  
356 these isolates captured the taxonomic diversity of endophytes living in the root,  
357 including bacteria present in low titers in the original sample (*t2*). It also provided a  
358 mean to obtain insights into the biosynthetic potential specific to the cyanobacteria

359 inhabiting the coralloid root, which could be driving community interactions. In the  
360 following sections we describe the results obtained from this effort in three sub-  
361 sections, overall taxonomic diversity, cyanobacteria phylogenetic relationships and  
362 specificity of BGCs present in the *Dioon* coralloid roots.

363

364 ***Dioon* coralloid roots show ample endophyte diversity of taxa beyond and within**  
365 **cyanobacteria.**

366

367 *Taxa assessment based in 16S rRNA.* Cultivable bacteria constitute only a biased subset  
368 of the total endophyte biodiversity, yet from our 16S rRNA sequences alone we found  
369 470 isolates grouped into 242 OTUs, distributed in 17 families and 11 bacterial orders,  
370 with 27 genera in total, representing most of the known bacterial groups (**Table 1**. See  
371 also Additional file 3: **Table S3**). As seen in our 16S rRNA phylogenetic reconstruction  
372 (**Fig. 2**), all of our sequences grouped within monophyletic clades, and most trees  
373 within each clade show that there are new species that remain to be described, in almost  
374 all of the genera found within the cycad coralloid root (see also Additional file 4: **Fig.**  
375 **S1**). An 87% of the taxa identified can be taxonomically classified as diazotrophic plant  
376 endophytes, validating our endophyte isolation procedures (see Materials & Methods).  
377 Indeed, most OTUs grouped within the genera *Streptomyces*, *Bacillus*, *Rhizobium*,  
378 *Stenotrophomonas*, *Pseudomonas*, *Mitsuaria*, *Achromobacter* and *Burkholderia*, which  
379 are known for their extraordinary taxonomic diversity, their ability to establish  
380 symbiont relationships across the tree of life, or are commonly found in the soil or the  
381 plant rhizosphere.



382 We confirmed previous reports of other bacteria associated to the cycad  
383 coralloid root, namely, *Bacillus*, which was previously reported as associated to the  
384 outside of the coralloid root; *Streptomyces*, previously isolated as an epiphyte [23],  
385 which grew on our selective media (ISP4); and *Pseudomonas* [19] growing indistinctly  
386 in our four non-selective media. As expected, we confirmed endophytes that belong to  
387 *Nostoc* [5], but also found *Tolypothrix*, a previously unreported genus of Nostocales  
388 living in the coralloid root. We isolated six strains belonging to this genus according to  
389 16S rRNA characterization.

390 Our results also show that OTUs are shared among samples and species, with no  
391 specific distribution among the various isolation culture media (**Fig. 2**). There are  
392 environment-specific trends such as higher diversity in the dry environment. We  
393 observed a tendency in the 16S rRNA data showing that some genera occur only in dry  
394 (JP; e.g. *Rhizobium*), or only in humid (RF; e.g. *Xanthomonas*) forest environments,  
395 with a few genera occurring in both (e.g. *Burkholderia*). In terms of species diversity  
396 and abundance, the Shannon-Weaver and Simpson biodiversity indices based on genera  
397 abundance from 16S rRNA sequences have higher diversity in the dry environment than  
398 in the humid environment (Additional file 5: **Table S4**). We consider these results  
399 preliminary and limited by the use of cultivable approaches, but valid as they compare  
400 samples treated under the same conditions and thus informative to define further  
401 ecological studies.

402

403 *Taxa assessment based in co-cultures metagenomics.* We extracted and sequenced  
404 whole-community metagenomic DNA from *t1* and *t2* subcommunity co-cultures with  
405 the aim of enriching for specific interactions in response to growth conditions. We were

406 able to sequence metagenomes from six different individuals grown on eutrophic  
407 conditions after 72 hours, whose DNAs were pooled as limited diversity was expected  
408 (JPPOOL and RFPOOL); from four different individuals after 30 days of culture in  
409 oligotrophic conditions, two from each of the two environments (JP2, JP6 and RF1,  
410 RF3); and after 365 days, same conditions, one from each environment (JP6 and RF3)  
411 (**Table 2**. see also Additional file 6: **Table S5**).

412 In terms of taxonomic diversity, each OTU-assignment strategy recovered  
413 different taxa and in different proportion (Table 2). Notably, despite visual confirmation  
414 of the occurrence of heterocyst-forming cyanobacteria in green cultures (Additional file  
415 7: **Fig. S2**), mOTUS revealed only a minor proportion of cyanobacteria, only 6%. In  
416 contrast, MG-RAST likely overestimated diversity at 39%. Kraken provided and  
417 intermediate result with 12%. Kraken is also a sequence classification technique that  
418 can exclude sequence contaminants from the draft assembly, allowing us to generate a  
419 symbiotic cyanobacteria marker database as reference for future classification. Thus,  
420 Kraken-identified OTUs were used for all subsequent analyses.

421 In Kraken-based OTUs, specifically associated to one of the metagenomes (JP),  
422 we also found *Calothrix*, previously reported in *Encephalartos* [16, 17] and in *Cycas*  
423 *revoluta* [18]; and *Caulobacter*, which can be found associated to cyanobacteria [19].  
424 Of the Nostocales we were unable to recover *Tolypothrix* in the metagenomes. Notably,  
425 taxa identified in the four metagenomes mostly overlap (**Fig. 3**. See also Additional file  
426 8: **Figure S3**). The few exceptions that were unique to a sample include species such as  
427 *Shewanella* specific to JP2 from the dry environment, and *Cronobacter* specific to RF3  
428 in the humid environment. Likewise, the original taxonomic diversity from the  
429 environmental isolates (*t0*), as revealed by their 16S rRNAs sequences, and that found

430 in the co-culture sub-communities (*tI*), measured as OTUs by Kraken, overlap only  
431 partially. Specifically, we recovered 12 OTUs with 16S rRNAs that were not recovered  
432 with Kraken, and 79 OTUs discovered only with Kraken, showing the complementarity  
433 of our approaches.

434 Biodiversity indices showed the same tendency as in the 16S rRNA results, in  
435 which the dry environment is more diverse than the humid (Additional file 5: **Table**  
436 **S4**). In all cases results from BG11 co-cultures show higher diversity than those  
437 obtained from the *Caulobacter* + mannitol medium. Similar to the process of  
438 eutrophication in biofilms, in which nutrient availability affects biofilm diversity and  
439 composition [53], rapid growers and presumably primary producers colonized and took  
440 over in the eutrophic medium, resulting in overall low diversity. In contrast, the results  
441 of the oligotrophic conditions suggest a cyanobacteria-centric community enables  
442 diversity. Indeed, rarefaction curves based on Kraken estimates suggest we captured 40-  
443 60% of the microbial community in the BG11 media (15 genera in JP6), with the least  
444 being the results obtained from the co-cultures grown on the *Caulobacter* + mannitol  
445 medium (Additional file 9: **Figure S4**).

446 Differences in genera identified with 16S rRNA and metagenomes could be  
447 explained because our metagenomes may not be deep enough to recover cyanobacteria-  
448 associated OTUs; because taxa presence may fluctuate in the cultures; and/or because  
449 cyanobacteria sequences are too divergent to be captured. It is likely that all three  
450 factors influenced our results. Despite these issues and differences in the media, we  
451 confirmed the occurrence of many of the bacterial endophyte taxonomic groups in the  
452 metagenomes, which were previously isolated and characterized with 16S rRNA. In  
453 sum, it is clear from these results that we have captured a significant fraction of the

454 taxonomic diversity of the endophytes in the cycad coralloid root, and that the  
455 combination of isolation and shotgun metagenomics results in a realistic representation  
456 of the cycad coralloid bacterial community.

457

458 ***Dioon* cyanobacteria belong to the family *Nostocaceae* and are a monophyletic**  
459 **group**

460 In order to explore the specificity of our cyanobacterial isolates, we reconstructed a  
461 phylogeny from five markers (**Fig. 4a**. See also Additional file 10: **Figure S5**).

462 Although cyanobacteria phylogenetic history is likely reticulated [54], our tree is  
463 congruent with previous phylogenies that grouped cyanobacteria into mostly  
464 monophyletic clades, and we recover and support various known taxa relationships. For  
465 instance, we support the lack of monophyly of *Chlorogloeopsis* and *Fischerella* with  
466 *Chlorogloeopsis* strains grouped with the nostocalean *Scytonema* [55]. We also support  
467 the monophyly of heterocyst and akinete-bearing cyanobacteria of the sections IV and  
468 V [56, 57]. A deeper discussion of the phylogeny is out of the scope of this article, but it  
469 will serve as additional evidence in the complex relationships of the cyanobacteria.

470 Hereafter we focus on the Nostocaceae as they are the closest to our samples, and  
471 species from the IV and V group are able to establish various types of symbiotic  
472 associations [58].

473 Previous molecular studies and our own data show that choice of genome-wide  
474 markers, and the type of OTU assignment methods, significantly affect the ability to  
475 recover Nostocaceae phylogenetic history. Our results were contingent on using 198  
476 genome-wide orthologs from a broad and curated database (Additional file 1: **Table**  
477 **S1**; Additional file 2: **Table S2**), combined with Kraken to assign OTUs, which was

478 best at detecting cyanobacteria. Overall, our phylogeny (**Fig. 4b**) shows that *Calothrix*  
479 PCC 7507 fails to group within the *Rivulariaceae* and is instead nested within the  
480 Nostocaceae. We confirmed the presence of *Anabaena* (metagenomes) first mentioned  
481 as algae in the cycad literature [13]; and of *Nostoc* (isolates) [18], and show that they  
482 each separate clearly in our phylogeny. Also, *Nostoc* is sister to *Anabaena*,  
483 *Aphanizomenon* and *Trichormus* [59, and references therein]. A previously recognized  
484 clade using 16S rRNA, constituted by *Anabaena* species associated to *Aphanizomenon*  
485 species, with *A. cylindrica* as sister to the rest [60], is also distinct in our phylogeny  
486 (Clade I). This group includes the fern endophyte *Nostoc azollae* 0708, supporting  
487 original descriptions of *Anabaena* fern symbionts [61] and similar findings with 16S  
488 rRNA [59]. The *Nostoc* free-living PCC 7120 grouped distantly to strains of symbiotic  
489 origin.

490       Importantly, our *Dioon* isolates from T09, 106C and RF31YmG form a  
491 monophyletic clade. This contradicts previous studies in which different species of  
492 cycads host multiple cyanobacteria and do not form cycad or host-specific clades [6, 62,  
493 63]. The isolate T09 was obtained from coralloid roots of *Dioon caputoi*, collected  
494 previously by our group in dry shrubland from the Tehuacan Valley in Puebla, and  
495 added as a control. This result suggests specificity of Nostocaceae symbionts within  
496 *Dioon* species. It also shows diverging evolutionary trajectories of *Nostoc* species  
497 associated with cycads, from those of the free-living Nostocaceae (**Fig. 4b**). Congruent  
498 with these findings, a 16S rRNA phylogeny of Nostocacean cyanobacteria shows that  
499 hormogonia-producing species symbiotic to *Gunnera* ferns, *Anthoceros*, and cycads,  
500 tend to cluster together [59].

501 The name of the new *Dioon* cyanobacteria symbionts remains to be determined.  
502 *Tolypothrix* sp PCC 7601 is sister taxon to our *Dioon* isolates, and they are sister to two  
503 other plant symbionts: *Nostoc* sp KVJ20 (PRJNA310825), which lives in special  
504 cavities located on the ventral surface of the gametophyte of the Norway liverwort  
505 *Blasia pusilla* [64]; and *Nostoc punctiforme* PCC73102 (ATCC 29133), associated with  
506 the Australian cycad *Macrozamia* [65]. *Calothrix* sp. PCC 7507 and *Fortiea contorta*  
507 PCC7126 are sister taxa to our isolates clade (Clade II). Thus, it is concluded that *Dioon*  
508 cyanobacteria endophytes belong to the family Nostocaceae, and that they show a  
509 monophyletic origin. This suggests that our isolates may be specialized bacteria, with  
510 unique metabolic and other phenotypic features that warrant further characterization and  
511 polyphasic taxonomic determination.

512

513 **Identification of BGCs in sub-community metagenomes suggests metabolic**  
514 **specialization of *Dioon* cyanobacteria**

515 Mapping the size of each bacterial genome onto the phylogeny showed that our *Dioon*  
516 coralloid endophytes have larger genomes sizes than all other close relatives, while  
517 maintaining their (G+C)-content (**Fig. 4b**). Large genomes correlate with the ability of  
518 bacteria to produce specialized metabolites. Thus, we aimed at exploring the coralloid  
519 root microbiome functions in detail by identifying examples of BGCs putatively  
520 directing the synthesis of specialized metabolites (**Fig. 5**). Genome mining of isolate  
521 106C revealed 18 BGCs (Additional file 11: **Table S6**). The analysis of the distribution  
522 of these BGCs among the selected Nostocaceae genomes (Additional file 12: **Table S7**)  
523 revealed that the heterocyst glycolipid (BGC 16), the only BGC with a defined product  
524 [66], and BGC 2, a terpene of unknown structure, were present in all analyzed genomes.

525 Mining of other known molecules associated with cycad cyanobionts, such as nodularin  
526 [67], or other known BGCs found in members of the genus *Nostoc*, yielded negative  
527 results.

528 In contrast, half of the BGCs were uniquely found within *Dioon* symbionts  
529 including isolate 106C. Remarkably, these nine BGCs are absent in the well-annotated  
530 genome of *Nostoc punctiforme* PCC73102, a strain isolated from an Australian *Zamia*.  
531 These observations support the metabolic specialization of *Dioon* cyanobionts. Among  
532 the *Dioon*-specific cyanobacterial BGCs we found four coding for lantipeptides,  
533 namely, BGC 1, 9, 10, 17 (**Fig. 5**, see also Additional file 13: **Text S1**). BGC 20  
534 includes genes coding for one adenylation domain, one thiolation domain and one  
535 thioesterase domain, which may be involved in the synthesis of modified amino acids,  
536 or in the formation of a yet-to-be discovered metabolite. The remaining four BGCs code  
537 for NRPSs, including one NRPS-PKS hybrid, BGC 21, which codes for a PKS-NRPS  
538 hybrid system potentially directing the synthesis of a hybrid peptide with three residues  
539 (Phe-Thr-Phe) and a hydroxyl-iso-butyrate group as the C-terminal substituent.

540 BGC12, which caught our attention, codes for an assembly line predicted to  
541 direct the synthesis of an N-terminal acylated hexapeptide with several modifications,  
542 such as the epimerization of four of its residues, the N-acylation of its second amidic  
543 bond, and the reduction of its C-terminal end to yield an aldehyde group. The N and C  
544 terminal modifications on this peptide are typical of small peptide aldehyde protease  
545 inhibitors, which have been previously reported on cyanobacteria [68]. Alternatively,  
546 the product of this biosynthetic system may be a siderophore, as iron-related genes were  
547 found next to the NRPS coding-genes and previous reports have shown that reductase  
548 domain-containing NRPS systems such as in myxochelin [69], are linked to iron

549 chelators. The BGC 22 encodes a small NRPS system for a dipeptide (Gly-Val), which  
550 in 106C and RF3Mg seems to be associated to genes coding for chemotaxis proteins,  
551 also present in the corresponding region in T09.

552 BGC 23, the most interesting of all, codes for a NRPS system putatively  
553 directing the synthesis of a tripeptide consisting of leucine, valine and tyrosine residues,  
554 as well as an N-terminal acylation, an N-methylation at an amide bond of the isoleucine  
555 residue, plus a domain of unknown function likely modifying the tyrosine residue.  
556 Remarkably, the order of the domains in the BGC suggests lack of co-linearity, which  
557 may imply domain skipping or recycling. A search for peptides containing such  
558 modifications, performed with the server PRISM that includes a feature for de-  
559 replication of known chemical structures [52], directed our attention to nostoginins, a  
560 specialized metabolite whose biosynthetic pathway remains unknown. Nostoginin A is  
561 an acylated tripeptide (Leucine-Valine-Tyrosine) with N-acylations at the isoleucine  
562 and tyrosine residues, originally isolated from a member of the genus *Nostoc* [70], and  
563 shown to be a protease inhibitor with specificity towards aminopeptidases. Similar  
564 bioactivity has been found for its congeners nostoginin B, microginins FR1 and SD755,  
565 and oscillaginins A and B [71]. Interestingly, a nostoginin congener (Nostoginin B),  
566 which includes an extra tyrosine group at the C- terminal end, was also isolated from  
567 the same *Nostoc* strain as nostoginin A. The amino acid specificity of BGC 23  
568 adenylation domains, the location of the modification on the leucine and tyrosine  
569 residues, the lack of collinearity, the presence of N-terminal acylation domains, the  
570 occurrence of peptidase coding genes in the BGC, and the taxonomic origin of  
571 nostoginins, strongly suggest that BGC 23 is linked to these metabolites (**Fig. 5**).



572           In addition to our genome-driven analysis, we also assembled, annotated and  
573 mined, *de novo*, the metagenomes of *t1* and *t2* oligotrophic co-cultures in an iterative  
574 fashion. First, by identifying sequence signatures of biosynthetic enzymes using  
575 antiSMASH, and second, by extending the contigs with hits by iterative mapping and  
576 assembly. This approach only revealed in all metagenomes together of *t1* five short  
577 signal sequences (less than 3.5 Kbp) that are suggestive of enzyme genes that could be  
578 part of BGCs. It seems that although representative of the rich biological diversity of the  
579 root, the lower coverage of these metagenomes hampered our ability to obtain loci long  
580 enough to allow proper annotation of presumed BGCs. In contrast, for *t2*, where  
581 bacterial diversity has been enriched we found two complete BGCs in the RF3 sub-  
582 community metagenome, both clearly coming from cyanobacteria, the most abundant  
583 taxa in the co-culture (**Table 2**). Indeed, these BGCs coincided with those found in the  
584 RF31YmG genome extracted from RF3 metagenome, showing that a computational  
585 pangenomic analysis of metagenomes is a promising approach to capture the  
586 biosynthetic potential of co-cultures.  
587

## 588 **Discussion**

589 Our combined strategy of co-cultures at different timescales and genomic and  
590 metagenomic sequencing analyzed with a phylogenomic framework enabled us to study  
591 bacterial endosymbionts that coexist in the same cycad host, and identify the BGCs  
592 associated to their coralloid root-specific niche. We focus our discussion on the taxa  
593 found in the bacterial isolates, and OTUs present in the metagenomes, and we refer to  
594 species and OTUs interchangeably.

595

### 596 *The microbiome of the cycad coralloid root reveals a biodiverse community, with* 597 *monophyletic grouping of cyanobacteria*

598 Our evidence undoubtedly shows that within the cycad coralloid root there is a highly  
599 diverse bacterial community within the cycad coralloid root of at least 27 genera  
600 identified with 16S rRNA of which 12 were not recovered with Kraken, and 79  
601 additional genera identified in the metagenomes, which includes all of the previously  
602 reported Nostocales and newly reported genera. We validated previous reports of taxa  
603 for which their endophytic origin and presence was unclear or doubtful. Cyanobacteria  
604 are present, but also many other taxa that interact in a community.

605 We also support previous morphological observations that showed that an  
606 individual cycad plant could harbor diverse communities that differ in their taxonomic  
607 composition and life-strategy [23], from soil dwellers to well-known plant symbionts.  
608 Morphological studies observing mucilaginous material inside the coralloid root [14,  
609 20] are also congruent with the microbiome consortium we describe. However, most of  
610 the abundant genera were shared among samples, which suggests weak taxonomic  
611 specificity in different environments. Similarly, the majority of the taxa identified in the

612 phylogeny can be taxonomically classified as diazotrophic plant endophytes, which  
613 points toward functional congruence associated with nitrogen fixation, rather than  
614 phylogenetic filtering, and suggests a taxonomic and functional core.

615         Although many other groups are worth exploring, we focused on cyanobacteria  
616 as the main group of interest given previous records of this group in cycads, their ability  
617 to establish symbiosis with most lineages of eukaryotes in many different types of  
618 tissues, and in plants with known co-evolutionary histories [72]. This bacterial group is  
619 also renowned for its potential to synthesize specialized metabolites of applied and  
620 evolutionary interest.

621         Among our most interesting findings is the monophyletic placement of our  
622 cyanobacterial samples, which confirm a single morphological observation of possible  
623 specificity among cyanobacteria coralloid root endophytes (then termed phycobionts),  
624 and their hosts, including *Dioon* [5], and contrasts with several previous notions  
625 regarding relationships between *Nostocaceae* and their hosts. Cyanobionts in other  
626 systems, such as cyanobacteria from a single lichen species, are often more closely  
627 related to free-living microorganisms, strains belonging to other species, or to plant  
628 symbionts, than to each other. Likewise, other studies of symbiotically competent  
629 *Nostoc* isolates suggest that they are not specialized and strains isolated from one plant  
630 species are capable of infecting phylogenetically distant hosts [59, 73, 74]. These  
631 contrasting previous observations could be biased by partial taxon identification in what  
632 we know now is a diverse cycad coralloid root microbiome, including several different  
633 cyanobacteria genera. Additionally, those phylogenies were based on samples collected  
634 growing outside of their place of the cycad's native distribution [75]. As data is  
635 gathered from more genomes of bacterial cycad symbionts, it will be possible to test for

636 other co-evolutionary relationships, including horizontal gene transfer between bacteria  
637 and the eukaryote host, and other patterns that suggest close evolutionary histories.

638

639 ***Cultivated bacterial sub-communities are useful to assess functional interactions of***  
640 ***the root microbiome***

641 We found congruent results in diversity patterns among 16S rRNA and metagenomes,  
642 yet there are clear limitations of 16S rRNA and even genome-wide markers to carry out  
643 in-depth microbiome analyses, depending on how OTUs are assigned. There are even  
644 more limitations to understanding their functional interactions. We increased our ability  
645 to identify a diverse array of organisms using cultivated bacterial sub-communities (*t1*,  
646 *t2*) and exploring their metagenomes with phylogenomic tools. Most of the genera with  
647 only a few species were recovered in *t1*, and genera with many species were recovered  
648 in both *t0* and *t1*. The differences in composition with genera identified without  
649 enrichment (*t0*) was expected, because environmental sampling and enriched inoculant  
650 complement each other, and aim to recover distinct aspects of the microbiome's  
651 composition [27]. These patterns can also be explained by various scenarios: i) rare  
652 groups present in low abundance can only be recovered in sub-community co-cultures  
653 on which they increase in biomass; ii) some organisms are fast growers irrespective of  
654 media, and will dominate in OTUs, simply by chance, iii) some groups are more media-  
655 specific; and/or iv) groups in BG11 (*t1*) are recovered as a result of functional  
656 interactions to pre-adapted cyanobacteria-associated groups.

657         The long-term one-year co-culture (*t2*) allowed us to explore at least some of the  
658 aforementioned possibilities. Although dynamic, the initial amount of inorganic  
659 nitrogen available in these co-cultures became a limiting factor over time. Hence, the

660 establishment of stable communities after a year with emerging and surviving taxa  
661 suggests that Nitrogen fixation is at least one of the main driving forces in the assembly  
662 of the coralloid root community. Plant-associated and slow-growing actinobacterial  
663 taxa, renowned for being prolific producers of specialized metabolites, are abundant in  
664 these communities. Further exploration of the metabolic-driven hypotheses emerging  
665 from these observations in different conditions, with an emphasis on Nitrogen fixation  
666 and physiological studies of the community, is required to understand the complexity of  
667 such community. For now, we can conclude that co-cultures are a strategy that allows  
668 assessing deeper sub-community functional interactions within the microbiome of a  
669 specialized organ, as it is the cycad coralloid root.

670

671 ***Large genome size as a signature of facultative lifestyles in cycad cyanobacteria***  
672 ***symbionts***

673 Most bacterial endosymbionts of plants or animals show a reduction in genome size  
674 compared to free-living relatives [76], yet our endosymbiont samples have larger  
675 genome sizes than all other closely related taxa in their phylogeny. Large genome sizes  
676 in endosymbionts are usually attributed to a facultative relationship that requires  
677 retaining free-living stages. For instance, rhizobial nitrogen-fixing bacteria in root-  
678 nodules of legumes that exhibit multiple lineages with genome expansions compared to  
679 closely related taxa ([77] and references therein), are also more similar in genome  
680 content and size to other plant symbionts than to closely related species [78]. Other  
681 facultative symbionts which form Nitrogen-fixing root nodules in angiosperms have  
682 large genome sizes adapted to shifting from the soil to the plant environment [79], while  
683 others such as *Brucella*, *Wolbachia* or *Agrobacterium* have favored expansions of

684 genome size to cope with complex and varying life-styles [80]. Thus, a feasible  
685 hypothesis is that the *Nostocaceae* taxa we found associated to the cycad coralloid root,  
686 have experienced a large genome expansion driven by selection to initially survive the  
687 structural, ecological and biological complexity of the soil from which they are  
688 recruited.

689         Additionally, a large repertoire of genes would be required to maintain the  
690 developmental phenotypic plasticity of the cyanobiont cells to adapt to the inside of the  
691 cycad host. Extremely plastic symbionts, such as *Nostoc* species, have notorious  
692 complex life cycles that require cell differentiation of the organism to be able to enter  
693 the host plant and disperse [81]. The only other cyanobacteria cycad symbiont  
694 sequenced, *Nostoc punctiforme* from an African cycad *Macrozamia* [65], is  
695 phenotypically plastic and ranges from photoautotrophic to diazotrophic, to  
696 facultatively heterotrophic. Its vegetative cells can develop into nitrogen-fixing  
697 heterocysts and have transient differentiation into hormogonia. Its genome shows 29%  
698 unique protein-encoding sequences of known function, with roles in its cell  
699 differentiation and symbiotic interaction properties [65]. It also has numerous insertion  
700 sequences and multilocus repeats, as well as genes encoding transposases and DNA  
701 modification enzymes, which would be congruent with genomic plasticity required to  
702 sense and respond to the environment outside and inside the plant [65].

703         In sum, taxonomic diversity of the coralloid root, combined with monophyly of  
704 the large *Nostocaceae* genomes found in the cycad coralloid root, could be a result of  
705 imposed constraints of the facultative symbiotic lifestyle, and the broad symbiotic  
706 competence with the plant host. The facultative nature of cyanobionts of *Dioon* would  
707 suggest they are secondary endophytes acquired from environmental sampling with

708 host-specificity to *Dioon*.

709           It remains to be examined how the genomes of our *Dioon* cyanobionts  
710 expanded. Upcoming work on the comparative genomics of the cycad coralloid root  
711 microbiome should test for trends in genome size, AT content, changes in the content  
712 and distribution of repeats and mobile elements, distribution of accumulated mutations  
713 and type of genes gained or lost and pseudogenization. All these factors could inform  
714 the nature of the cycad-bacterial interactions in ecological and evolutionary time. Of  
715 particular interest to us, is how metabolic functions are retained or acquired in relation  
716 to loci present within the root microbiome. We begin exploring this by identifying and  
717 analyzing the distribution of BGCs in our bacterial genomes, which we discuss in the  
718 final section below.

719

720 ***BGCs are conserved and unique to the cycad cyanobionts***

721 The bacterial repertoire of specialized metabolites can correlate to environmental  
722 selective pressures [82] and result in conserved metabolic and genetic repertoires among  
723 species facing similar challenges, including those from plant symbiotic relationships. In  
724 Nostocales, although free-living strains are often competent and will form symbiotic  
725 interactions under laboratory conditions with many hosts [83], most recruited  
726 cyanobacteria are capable of producing specific compounds to survive within the plant.  
727 A remarkable example of a specialized metabolite involved in symbiosis is nosperin, a  
728 polyketide produced by a lichen-associated *Nostoc* cyanobacteria [84]. This molecule  
729 belongs to the pederin family, which includes molecules produced by non-  
730 photosynthetic bacterial symbionts from beetles and sponges [84], suggesting a role on  
731 eukaryote-prokaryote interaction. Nosperin has also been found in the liverwort *Blasia-*

732 associated and in free-living *Nostoc* cyanobacteria [64] suggesting that in cycads,  
733 nosperin producers are selected for symbiosis, although production is not necessarily  
734 induced while inside the coralloid roots.

735         None of the BGCs for specialized metabolites previously reported for *Nostoc*  
736 cyanobionts of lichens, bryophytes or other cycads, namely, nosperin, mycocystin or  
737 nodularin, could be found in the *Dioon* cyanobionts. Our unique biosynthetic repertoire  
738 of several BGCs provides an example of metabolic specialization that correlates more  
739 with the plant host biology than with the environmental conditions or geography.

740         A chemical insight derived from our genome mining efforts, which may have a  
741 strong bearing on the evolution and biology of the *Dioon*-bacteria symbiosis, relates to  
742 the potential of *Dioon* cyanobionts to produce at least two small peptide protease  
743 inhibitors: the nostoginin-like peptides predicted to be produced by BGC 23; and the  
744 acylated penta-peptide aldehyde predicted to be produced by BGC 12. The specific  
745 presence of these metabolites in the cyanobionts may imply that proteolysis is involved  
746 in the cyanobacteria-cycad interaction. Protease activity in the coralloid roots may be  
747 linked to the reconfiguration of the root architecture or the filtering of the microbiome.  
748 This is an interesting possibility as the involvement of proteases in root nodule  
749 symbiosis has been observed previously between arbuscular mycorrhiza and legumes  
750 [85]. Within this context, our sub-community metagenomics approach provided a  
751 platform for BGC discovery that can be applied to other microbial-host interactions.  
752 Also, the BGC patterns found in the coralloid root add to the growing notion that  
753 symbiotic relations occur under heavy influence of chemical interactions, providing a  
754 rich source of novelty for drug discovery [84].

755



## 756 **Conclusions**

757 Our work shows that the coralloid root microbiome is a highly diverse community, with  
758 most genera shared within *Dioon* species regardless of their original environment or  
759 plant host. Our methods of enriched sub-community metagenomics and phylogenomics  
760 were able to recover a good portion of the taxonomic and phylogenetic diversity and  
761 reveal genes underlying the production of previously unreported specialized metabolites  
762 that result from bacterial functional interactions. We also provide emerging evidence of  
763 co-evolution between cyanobacteria and their plant hosts, suggested by monophyly of  
764 the samples and the presence of unique BGCs to their clade.

765 The coralloid root microbiome is likely established by dual forces of host-driven  
766 selection and environmental recruitment of cyanobacteria and possibly other taxa that  
767 are capable of transitioning from free-living to endosymbiotic lifestyles, and the  
768 functional capacities of the bacterial consortium itself. Future phylogenomic work on  
769 the cycad coralloid root microbiome via an integrated analysis of genome organization  
770 and expression of specialized metabolite production, as well as of their relationship to  
771 the fitness of the host, will further facilitate our understanding of the evolutionary  
772 history of the cycad microbiome.

773

## 774 **References**

- 775 1. Norstog KJ and Nicholls TJ, The Biology of the Cycads. Cornell University  
776 Press: New York. 1997. p. 504
- 777 2. Bergensen F, Lindblad P, and Rai A. Nitrogen fixation in coralloid roots of  
778 *Macrozamia communis*. L. Johnson. Aus J Bio Sc. 1986.18:1135-42.

- 779 3. Halliday J and Pate J. Symbiotic nitrogen fixation by blue algae in the cycad  
780 *Macrozamia riedlei*: Physiological characteristics and ecological significance.  
781 Aus J Plant Phys. 1976.3:349-58.
- 782 4. Grove T, O'connell A, and Malajczuk N. Effects of fire on the growth, nutrient  
783 content and rate of nitrogen fixation of the cycad *Macrozamia riedlei*. Australian  
784 Journal of Botany. 1980.28:271-81.
- 785 5. Caiola M. On the phycobionts of the cycad coralloid roots. New Phytologist  
786 1980.85:537-44
- 787 6. Zimmerman WJ and Rosen BH. Cyanobiont diversity within and among cycads  
788 of one field site. Canadian J Microbiol 1992.38:1324-8.
- 789 7. Costa JL and P L, Cyanobacteria in Symbiosis with Cycads, in Cyanobacteria in  
790 Symbiosis. Kluwer Academic Publishers: Dordrecht. 2002. p. 195–205.
- 791 8. Costa J, Romero E, and Lindblad P. Sequence based data supports a single  
792 *Nostoc* strain in individual coralloid roots of cycads. FEMS Microbiol Ecol.  
793 2004.49:481-7.
- 794 9. Costa J, Paulsrud P, and Lindblad P. Cyanobiont diversity within coralloid roots  
795 of selected cycad species. FEMS Microbiol Ecol 1999.28:85-91.
- 796 10. Thajuddin N, Muralitharan G, Sundaramoorthy M, Ramamoorthy R,  
797 Ramachandran S, et al. Morphological and genetic diversity of symbiotic  
798 cyanobacteria from cycads. J Basic Microbiol. 2010.50:254-65.
- 799 11. Gehringer M, Pengelly J, Cuddy W, Fieker C, Forster P, et al. Host selection of  
800 symbiotic cyanobacteria in 31 species of the Australian cycad genus:  
801 *Macrozamia* (Zamiaceae). Molecular Plant-Microbe Interactions 2010.23:811-  
802 22.

- 803 12. Cuddy W, Neilan B, and Gehringer M. Comparative analysis of cyanobacteria in  
804 the rhizosphere and as endosymbionts of cycads in drought-affected soils. FEMS  
805 Microbiol Ecol. 2012.80:204-15.
- 806 13. Chaudhuri HaA, A.R. The coral-like roots of *Cycas revoluta*, *Cycas circinalis*  
807 and *Zamia floridana* and the alga inhabiting them. J Indian Bot Soc. 1931.10:43-  
808 59.
- 809 14. Baulina O and Lobakova E. Atypical cell forms overproducing extracellular  
810 substances in populations of cycad cyanobionts. Microbiology. 2003.72:701-12.
- 811 15. Zvyagintsev D, Zenova G, Lobakova E, and Savelyev I. Morphological and  
812 physiological modifications of cyanobacteria in experimental cyanobacterium-  
813 actinomycete associations. Microbiology. 2010.79:314-20.
- 814 16. Grobbelaar N, Scott WE, Hattingh W, and Marshall J. The identification of the  
815 coralloid root endophytes of the southern African cycads and the ability of the  
816 isolates to fix dinitrogen. South African J Bot. 1987.53:111-8.
- 817 17. Huan T and Grobbelaar N. Isolation and characterization of endosymbiotic  
818 *Calothrix* (Cyanophyceae) in *Encephalartos hildenbrandii* (Cycadales).  
819 Phycologia. 1989 28:464-8.
- 820 18. Thajuddin N, Muralitharan G, Sundaramoorthy M, Ramamoorthy R,  
821 Ramachandran S, et al. Morphological and genetic diversity of symbiotic  
822 cyanobacteria from cycads. J Basic Microbiol. 2010.50:254-65.
- 823 19. Bershova O, Kopteva Z, and Tantsyyurenko E, The interrelations between the  
824 blue-green algae -the causative agents of the water 'bloom' - and bacteria. , in  
825 'Tsvetenie' Vody, A. Topanchevsky, Editor. Naukova Dumka: Kiev,  
826 USSR.1968. p. 159-71.

- 827 20. Ow M, Gantar M, and Elhai J. Reconstitution of a cycad-cyanobacterial  
828 association. *Symbiosis*. 1999.27:125-34.
- 829 21. Yamada S, Ohkubo S, Miyashita H, and Setoguchi H. Genetic diversity of  
830 symbiotic cyanobacteria in *Cycas revoluta* (Cycadaceae). *FEMS Microbiol Ecol*  
831 2012.81:696-706.
- 832 22. Meeks J, Physiological adaptations in nitrogen-fixing *Nostoc*-plant symbiotic  
833 associations, in *Prokaryotic Symbionts in Plants*, K. Pawlowski, Editor.  
834 Springer-Verlag: Berlin.2009. p. 181–205.
- 835 23. Lobakova ES, Orazova, MK and Dobrovol'skaya, TG. Microbial complexes  
836 occurring on the apogeotropic roots and in the rhizosphere of cycad plants.  
837 *Microbiology*. 2003.72:628.
- 838 24. De Luca P, Sabato S, and Vazquez-Torres M. *Dioon meroale* (Zamiaceae), a  
839 new species from Mexico. *Brittonia*. 1981.33:179-85.
- 840 25. Lázaro-Zermeño JM, González-Espinosa M, Mendoza A, and Martínez-Ramos  
841 M. Historia natural de *Dioon merolae* (Zamiaceae) en Chiapas, México.  
842 *Botanical Sciences*. 2012.90:73-87.
- 843 26. Traxler M and Kolter R. Natural products in soil microbe interactions and  
844 evolution. *Nat Prod Rep*. 2015.32:956-70.
- 845 27. Cibrián-Jaramillo A and Barona-Gómez F. Increasing metagenomic resolution  
846 of microbiome interactions through functional phylogenomics and bacterial sub-  
847 communities. *Frontiers in Genetics*. 2016.7:4.
- 848 28. Atlas, RM, *Handbook of Microbiological Media*, CRC press: Florida. 2004.  
849 ISBN 9781439804087.

- 850 29. Collection ATC, ATCC Catalogue of Bacteria and Bacteriophages. 1992:  
851 Rockville, MD.
- 852 30. Subba-Rao N, Soil Microorganisms and Plant Growth: Science Publishers, Inc.  
853 1995 p. 350. ISBN 1886106185.
- 854 31. Shirling E and Gottlieb D. Methods for characterization of *Streptomyces* species.  
855 Int J Syst Evol Microbiol. 1966.16:313-40.
- 856 32. Rippka R, Stanier R, Deruelles J, Herdman M, and Waterbury J. Generic  
857 assignments, strain histories and properties of pure cultures of Cyanobacteria.  
858 Microbiology. 1979.111:1-61.
- 859 33. Bolger AM, Lohse M, and Usadel B. Trimmomatic: a flexible trimmer for  
860 Illumina sequence data. Bioinformatics. 2014.30:2114-20.
- 861 34. Zerbino DR and Birney E. Velvet: Algorithms for *de novo* short read assembly  
862 using de Bruijn graphs. Genome Research. 2008.18:821-9.
- 863 35. Aziz RK, Bartels D, Best AA, DeJongh M, Disz T, et al. The RAST Server:  
864 Rapid Annotations using Subsystems Technology. BMC Genomics. 2008.9:75.
- 865 36. Li H and Durbin R. Fast and accurate short read alignment with Burrows-  
866 Wheeler Transform. Bioinformatics. 2009.25:1754-60.
- 867 37. Lane, D. J. 16S/23S rRNA sequencing. In Stackebrandt, E and Goodfellow, M,  
868 editors. Nucleic acid techniques in bacterial systematics. John Wiley & Sons,  
869 New York. 1991. p. 115-175
- 870 38. Quast C, Pruesse E, Yilmaz P, Gerken J, Schweer T, et al. The SILVA  
871 ribosomal RNA gene database project: improved data processing and web-based  
872 tools. Nucl Acids Res. 2013.41:D590--D6.

- 873 39. Sunagawa S, Mende DR, Zeller G, Izquierdo-Carrasco F, Berger SA, et al.  
874 Metagenomic species profiling using universal phylogenetic marker genes. *Nat*  
875 *Meth.* 2013.10:1196-9.
- 876 40. Oksanen J. BFG, Kindt R., Legendre P., Minchin P. R., O'Hara R. B., et al. .  
877 *Vegan: community ecology package. R Packag. version 2.* 2015.
- 878 41. Hurlbert SH. The nonconcept of species diversity: a critique and alternative  
879 parameters. *Ecology.* 1971.52:577-86.
- 880 42. Wood D and Salzberg S. Kraken: ultrafast metagenomic sequence classification  
881 using exact alignments. *Genome Biology.* 2014.15:R46.
- 882 43. Wilke A, Bischof J, Gerlach W, Glass E, Harrison T, et al. The MG-RAST  
883 metagenomics database and portal in 2015. *Nucl Acids Res.* 2016.44:D590-D4.
- 884 44. Shannon P, Markiel, A., Ozier, O., Baliga, N. S., Wang, J. T., Ramage, D.,  
885 Admin, N., Schwikowski, B., Ideker, T. Cytoscape: a software environment for  
886 integrated models of biomolecular interaction networks. *Genome Research.*  
887 2003.13:2498–504.
- 888 45. Edgar RC. MUSCLE: multiple sequence alignment with high accuracy and high  
889 throughput. *Nucleic Acids Res.* 2004.32:1792-7.
- 890 46. Ronquist F, Teslenko M, van der Mark P, Ayres D, Darling A, et al. MrBayes  
891 3.2: Efficient bayesian phylogenetic inference and model choice across a large  
892 model space. *Systematic Biology.* 2012.61:539–42.
- 893 47. Posada D and KA C. ModelTest: testing the model of DNA substitution.  
894 *Bioinformatics* 1998. 1998.14:817-8.
- 895 48. Huerta-Cepas J, Dopazo J, and Gabaldón T. ETE: a python Environment for  
896 Tree Exploration. *BMC Bioinformatics.* 2010.11:24.

- 897 49. Capella-Gutierrez S, Kauff F, and Gabaldón T. A phylogenomics approach for  
898 selecting robust sets of phylogenetic markers. *Nucl Acids Res.* 2014.42:e54-e.
- 899 50. Weber T, Blin K, Duddela S, Krug D, Kim H, et al. antiSMASH 3.0—a  
900 comprehensive resource for the genome mining of biosynthetic gene clusters.  
901 *Nucl Acids Res* 2015.43:W237-W43
- 902 51. Bachmann B and Ravel J. *In silico* prediction of microbial secondary metabolic  
903 pathways from DNA sequence data. *Methods in Enzymology.* 2009.458:181-  
904 217.
- 905 52. Skinnider M, Dejong C, Rees P, Johnston C, Li H, et al. Genomes to natural  
906 products PRediction Informatics for Secondary Metabolomes (PRISM). *Nucleic*  
907 *Acids Res* 2015.43:9645–62.
- 908 53. Costerton J, Lewandowski Z, Caldwell D, Korber D, and Lappin-Scott H.  
909 Microbial biofilms. *Annu Rev Microbiol* 1995.49:711–45.
- 910 54. Zhaxybayeva O, Gogarten JP, Charlebois RL, Doolittle WF, & Papke RT.  
911 Phylogenetic analyses of cyanobacterial genomes: Quantification of horizontal  
912 gene transfer events. *Genome Research.* 2006.16:1099–108.
- 913 55. Tomitani A, Knoll AH, Cavanaugh CM, and Ohno T. The evolutionary  
914 diversification of cyanobacteria: molecular-phylogenetic and paleontological  
915 perspectives. *PNAS.* 2006.103:5442-7.
- 916 56. Tomitani A, Knoll AH, Cavanaugh CM and Ohno T. The evolutionary  
917 diversification of cyanobacteria: Molecular–phylogenetic and paleontological  
918 perspectives. *PNAS.* 2006.103:5442-7.

- 919 57. Turner S, Pryer K, Miao V, and Palmer J. Investigating deep phylogenetic  
920 relationships among cyanobacteria and plastids by small subunit rRNA sequence  
921 analysis. *J Eukaryot Microbiol.* 1999.46:327-38.
- 922 58. Rai AN, Bergman, B., Rasmussen, Ulla, editors. *Cyanobacteria in Symbiosis.*  
923 Springer: Netherlands. 2002 p. 355. ISBN 9780306-48005-8.
- 924 59. Papaefthimiou D, Van Hove C, Lejeune A, Rasmussen U, Wilmotte A.  
925 Diversity and host specificity of *Azolla* cyanobionts. *J Phycol.* 2008.44:60-70.
- 926 60. Lyra C, Suomalainen S, Gugger M, Vezie C, Sundman P, Paulin L and Sivonen  
927 K. Molecular characterization of planktic cyanobacteria of *Anabaena*,  
928 *Aphanizomenon*, *Microcystis* and *Planktothrix* genera. *Int J Syst Evol Microbiol*  
929 2001.51:513-26.
- 930 61. Strasburger E. Die Controversen der indirecten Keimtheilung. *Arch Mikrob*  
931 *Anat* 1884.23:301.
- 932 62. Lindblad P, Haselkorn R, Bergman B, Nierzwicki-Bauer SA, and Rica C.  
933 *Microbiology. Symbiosis.* 1989:20- 4.
- 934 63. Zheng W ST, Bao X, Bergman B, Rasmussen U. High cyanobacterial diversity  
935 in coralloid roots of cycads revealed by PCR fingerprinting. *FEMS Microbiol*  
936 *Ecol.* 2002.40:215-22.
- 937 64. Liaimer A, Jensen JB and Dittmann E. A genetic and ghemical perspective on  
938 symbiotic recruitment of Cyanobacteria of the genus *Nostoc* into the Host Plant  
939 *Blasia pusilla* L. *Frontiers in Microbiology.* 2016.7.
- 940 65. Meeks JC, Elhai J, Thiel T, et al. An overview of the genome of *Nostoc*  
941 *punctiforme*, a multicellular, symbiotic cyanobacterium. *Photosynthesis*  
942 *Research.* 2001.70:85-106.



- 943 66. Soriente A, Sodano G, Cambacorta A, and Trincone A. Structure of the  
944 “heterocyst glycolipids” of the marine cyanobacterium *Nodularia harveyana*.  
945 Tetrahedron. 1992.48:5375–84.
- 946 67. Gehringer M, Adler L, Roberts A, et al. Nodularin, a cyanobacterial toxin, is  
947 synthesized in planta by symbiotic *Nostoc* sp. The ISME Journal. 2012.6:1834–  
948 47.
- 949 68. Fewer DP, Jokela J, Paukku E, et al. New Structural variants of aeruginosin  
950 produced by the toxic bloom forming cyanobacterium *Nodularia spumigena*.  
951 PLoS ONE. 2013.8:e73618.
- 952 69. Li Y, Weissman K, and Müller R. Myxochelin biosynthesis: direct evidence for  
953 two- and four-electron reduction of a carrier protein-bound thioester. J Am  
954 Chem Soc. 2008.130:7554–5.
- 955 70. Ploutno A and Carmeli S. Modified peptides from a water bloom of the  
956 cyanobacterium *Nostoc* sp. Tetrahedron. 2002.58:9949-57.
- 957 71. Sano T and Kaya K. A 3-amino-10-chloro-2-hydroxydecanoic acid-containing  
958 tetrapeptide from *Oscillatoria agardhii*. Phytochemistry. 1998.44:1503-5.
- 959 72. Rai AN, Soderback E, Bergman B. Cyanobacterium–plant symbioses. New  
960 Phytologist. 2000.147:449-81.
- 961 73. Johansson C and Birgitta B. Reconstitution of the symbiosis of *Gunnera*  
962 *manicata* Linden: cyanobacterial specificity. New Phytologist. 1994.126: 643-  
963 652.
- 964 74. Whitton BA, editor. Ecology of Cyanobacteria II: Their Diversity in Space and  
965 Time: Springer Science & Business Media: Netherlands. 2012. p.760. ISBN  
966 97894007-3855-3.

- 967 75. Papaefthimiou D, Mugnai HPM, Lukesova A, et al. Differential patterns of  
968 evolution and distribution of the symbiotic behaviour in nostocacean  
969 cyanobacteria. *Int J Syst Evol Microbiol*. 2008.58 553–64.
- 970 76. McCutcheon J. The bacterial essence of tiny symbiont genomes. *Curr Opin*  
971 *Microbiol*. 2010.13:73-8.
- 972 77. MacLean A, Finan T, and Sadowsky M. Genomes of the Symbiotic Nitrogen-  
973 Fixing Bacteria of Legumes. *Plant Physiol*. 2007.144:615-22.
- 974 78. Bentley S and Parkhill J. Comparative genomic structure of prokaryotes. *Annu*  
975 *Rev Genet* 2004.38:771-92.
- 976 79. Normand P, Lapierre P, Tisa L, Gogarten J, Alloisio N, et al. Genome  
977 characteristics of facultatively symbiotic *Frankia* sp. strains reflect host range  
978 and host plant biogeography. *Genome Res*. 2007.17:7-15.
- 979 80. Tsolis R. Comparative genome analysis of the alpha-proteobacteria:  
980 relationships between plant and animal pathogens and host specificity. *PNAS*.  
981 2002.99:12503–5.
- 982 81. Meeks J, Campbell E, Summers M, and Wong F. Cellular differentiation in the  
983 cyanobacterium *Nostoc punctiforme*. *Arch Microbiol* 2002.178:395–403.
- 984 82. Ziemert N, Alanjaryab M, and Weber T. The evolution of genome mining in  
985 microbes – a review. *Nat Prod Rep*. 2016.33:988.
- 986 83. West NJ and Adams DG. Phenotypic and genotypic comparison of symbiotic  
987 and free-living cyanobacteria from a single field site. *Appl Environ Microbiol*  
988 1997.63:4479-84.

- 989 84. Kampa A, Gagunashvili AN, Gulder TAM, et al. Metagenomic natural product  
990 discovery in lichen provides evidence for a family of biosynthetic pathways in  
991 diverse symbioses. PNAS. 2013.110:E3129-E37.
- 992 85. Takeda N, Kistner C, Kosuta S, et al. Proteases in plant root symbiosis.  
993 Phytochemistry. 2007.68:111-21.
- 994

995 **Table 1.** Taxonomic composition of endophytes isolated from *Dioon* coralloid roots

| Phylum                | Class               | Order              | Family                  | Genus                   | OTUs <sup>a</sup> |
|-----------------------|---------------------|--------------------|-------------------------|-------------------------|-------------------|
| <b>Bacteroidetes</b>  | Sphingobacteriia    | Sphingobacteriales | Sphingobacteriaceae     | <i>Mucilaginibacter</i> | 3                 |
|                       |                     |                    |                         | <i>Sphingobium</i>      | 1                 |
|                       |                     |                    |                         | <i>Sphingomonas</i>     | 2                 |
|                       |                     |                    |                         | <i>Variovorax</i>       | 1                 |
|                       | Cytophagales        | Cytophagales       | Cytophagaceae           | <i>Dyadobacter</i>      | 1                 |
| <b>Cyanobacteria</b>  | Cyanobacteria       | Nostocales         | Microchaetaceae         | <i>Tolypothrix</i>      | 6                 |
|                       |                     |                    | Nostocaceae             | <i>Nostoc</i>           | 2                 |
| <b>Firmicutes</b>     | Bacilli             | Bacillales         | Bacillaceae             | <i>Bacillus</i>         | 16                |
|                       |                     |                    | Paenibacillaceae        | <i>Paenibacillus</i>    | 2                 |
|                       |                     |                    | Staphylococcaceae       | <i>Staphylococcus</i>   | 1                 |
| <b>Proteobacteria</b> | Alphaproteobacteria | Rhizobiales        | Rhizobiaceae            | <i>Rhizobium</i>        | 32                |
|                       |                     |                    |                         | <i>Shinella</i>         | 2                 |
|                       |                     |                    | Brucellaceae            | <i>Ochrobactrum</i>     | 1                 |
|                       | Betaproteobacteria  | Burkholderiales    | Alcaligenaceae          | <i>Achromobacter</i>    | 33                |
|                       |                     |                    | Burkholderiaceae        | <i>Burkholderia</i>     | 39                |
|                       |                     |                    |                         | <i>Ralstonia</i>        | 2                 |
|                       |                     |                    |                         | <i>Mitsuaria</i>        | 8                 |
|                       |                     |                    |                         | <i>Variovorax</i>       | 1                 |
|                       | Gammaproteobacteria | Enterobacteriales  | Comamonadaceae          | <i>Variovorax</i>       | 1                 |
|                       |                     |                    | Enterobacteriaceae      | <i>Enterobacter</i>     | 3                 |
|                       |                     |                    |                         | <i>Luteibacter</i>      | 1                 |
|                       |                     |                    |                         | <i>Pantoea</i>          | 1                 |
|                       |                     |                    | <i>Pseudomonas</i>      | 21                      |                   |
|                       |                     |                    | <i>Luteibacter</i>      | 2                       |                   |
|                       | Pseudomonadales     | Pseudomonadaceae   | <i>Stenotrophomonas</i> | 35                      |                   |
|                       | Xanthomonadales     | Xanthomonadaceae   | <i>Xanthomonas</i>      | 2                       |                   |
| <b>Actinobacteria</b> | Actinobacteria      | Micrococcales      | Microbacteriaceae       | <i>Microbacterium</i>   | 5                 |
|                       |                     | Streptomyetales    | Streptomyetaceae        | <i>Streptomyces</i>     | 19                |

996 <sup>a</sup> Taxa identified in the literature as endophytes (italics) and/or diazotroph (bold) are shown.

997 **Table 2.** Taxonomic composition of sub-communities isolated from *Dioon* coralloid roots

| Sample <sup>a</sup> | Growth conditions                                               | Genera identified with different methods: total number (bold), most abundant (%) |                                     |                                             |
|---------------------|-----------------------------------------------------------------|----------------------------------------------------------------------------------|-------------------------------------|---------------------------------------------|
|                     |                                                                 | mOTUs                                                                            | Kraken                              | MG-RAST                                     |
| JPPOOL              | Eutrophic, 72 hours,<br><i>Caulobacter</i><br>medium + mannitol | <b>6</b> , <i>Bacillus</i> (87%)                                                 | <b>22</b> , <i>Bacillus</i> (84%)   | <b>512</b> , <i>Bacillus</i> (86%)          |
| RFPOOL              |                                                                 | <b>8</b> , <i>Bacillus</i> (99%)                                                 | <b>25</b> , <i>Bacillus</i> (65%)   | <b>524</b> , <i>Bacillus</i> (80%)          |
| JP2                 | Oligotrophic, 30<br>days, BG-11                                 | <b>42</b> , <i>Agrobacterium</i> (45%)                                           | <b>57</b> , <i>Rhizobium</i> (7%)   | <b>1273</b> , <i>Nostoc</i> (21%)           |
| JP6                 |                                                                 | <b>38</b> , <i>Pseudoxanthomonas</i> (22%)                                       | <b>69</b> , <i>Xanthomonas</i> (2%) | <b>1253</b> , <i>Xanthomonas</i> (8%)       |
| RF1                 |                                                                 | <b>33</b> , <i>Stenotrophomonas</i> (83%)                                        | <b>63</b> , <i>Nostoc</i> (3%)      | <b>1157</b> , <i>Stenotrophomonas</i> (20%) |
| RF3                 |                                                                 | <b>25</b> , <i>Stenotrophomonas</i> (42%)                                        | <b>61</b> , <i>Xanthomonas</i> (7%) | <b>1065</b> , <i>Xanthomonas</i> (22%)      |
| JP6                 | Oligotrophic, 1 year,<br>BG-11                                  | <b>70</b> , <i>Deinococcus</i> (25%)                                             | <b>69</b> , <i>Deinococcus</i> (4%) | <b>1957</b> , <i>Deinococcus</i> (26%)      |
| RF3                 |                                                                 | <b>67</b> , <i>Stenotrophomonas</i> (33%)                                        | <b>63</b> , <i>Nostoc</i> (3%)      | <b>1592</b> , <i>Nostoc</i> (13%)           |

998 <sup>a</sup>JPPOOL= JP1, JP2, JP6; RFPOOL = RF1, RF3, RF9.

999 **Legends to Main Figures**

1000

1001 **Figure 1. Pipeline to capture and characterize bacterial microbiome diversity.**

1002 Coralloid roots from cycads growing naturally in dry and humid deciduous tropical  
1003 forests were sampled (photo of coralloid root of approx. 9cm in length shown, not to  
1004 scale). Endophytes from the macerated root were isolated, following two strategies:  
1005 directly from the sample ( $t0$ ) and after enrichment using co-cultures of sub-  
1006 communities, and sampled after 30 days ( $t1$ ), although sampling can be done anytime  
1007 ( $t1...tn$ ). Cultivable bacteria were obtained using an array of six different media. Co-  
1008 cultures were characterized using shotgun metagenomics, and the resulting data was  
1009 used to select representative genomes from the endophyte culture collection that we  
1010 mined for functional information using a phylogenomic and comparative genomic  
1011 approaches.

1012

1013 **Figure 2. 16S rRNA Bayesian phylogeny of endophytes from coralloid roots of**

1014 *Dioon merolae*. The external ring refers to the two environments sampled: dry or JP (D  
1015 - orange) and humid of RF (H - blue) deciduous tropical forests. The inner ring refers  
1016 isolation strategy: directly from the sample ( $t0$  - white) or after enrichment using co-  
1017 cultures of sub-communities ( $t1$  - gray). Major bacterial groups are highlighted in  
1018 different colors across the tree.

1019

1020 **Figure 3. Network of taxa co-occurrence from different coralloid root samples.** The

1021 lines connecting the circles represent shared taxa identified with Kraken from the  
1022 metagenomes. Orange lines correspond to samples from the dry (JP) forest and blue to

1023 samples from the humid (RF) forest. The most abundant genera in the four  
1024 metagenomes are represented by circles. Circle diameters are scaled in accordance with  
1025 the number of reads associated to each genus.

1026 **Figure 4. Phylogeny of *Cyanobacteria*. A. Multilocus phylogeny.** The tree was  
1027 constructed with five molecular markers and genomes obtained from GenBank, plus our  
1028 genomes from T09, 106C and Rf31Y. Branches names have been colored according to  
1029 the genera originally assigned in GenBank (a larger version of the tree is available as  
1030 additional file 10: Figure S5); **B. Genome-wide phylogeny of the family *Nostocaceae*.**  
1031 The tree was constructed with 45 conserved proteins, and includes *Dioon* cyanobionts  
1032 106C, T09 and Rf31Ymg. The habitat type of each taxa is indicated with colored  
1033 bullets. The bars show a relatively homogeneous (G+C)-content among *Nostocaceae*  
1034 cyanobacteria, and a trend for larger genomes in *Dioon*-associated cyanobacteria.

1035 **Figure 5. *Dioon*-specific cyanobiont biosynthetic gene clusters for specialized**  
1036 **metabolites predicted from their genomes.** Genes are shown as colored boxes, the  
1037 tips of the boxes indicate the direction of their translation. Annotation color key is  
1038 provided. Domain organization, biosynthetic logic and products are indicated below  
1039 each BGC, except for lantipeptide encoded by BGCs 1, 9, 10 and 17, whose predicted  
1040 products are shown as additional file 13: Text S1.

1041

1042 **Declarations**

1043 **Ethics approval and consent to participate**

1044 Not applicable

1045 **Consent for publication**

1046 Not applicable

1047 **Availability of data and materials**

1048 The genomes generated during the current study are available in the GenBank public  
1049 repository as follows:

| 1050 | <b>SUBID</b> | <b>BioProject</b> | <b>BioSample</b> | <b>Accession</b> | <b>Organism</b>         |
|------|--------------|-------------------|------------------|------------------|-------------------------|
| 1051 | SUB2297132   | PRJNA360300       | SAMN06208854     | MTAV000000000    | <i>Nostoc</i> sp. T09   |
| 1052 | SUB2299096   | PRJNA360305       | SAMN06208961     | MTAW000000000    | <i>Nostoc</i> sp. 106C  |
| 1053 | SUB2299173   | PRJNA360315       | SAMN06209042     | MTAX000000000    | <i>Nostoc</i> sp. RF31Y |

1054

1055 Metagenomes are available at sequence read archive (ID number pending), and directly  
1056 from the corresponding author. Other data generated or analyzed during this study are  
1057 included in this published article and its supplementary information or additional files,  
1058 as enlisted:

1059

1060 **Additional file 1: Table S1.docx/ Proteins in the cyanobacterial core genome.**

1061 Annotated proteins used to reconstruct the cyanobacteria phylogenetic tree of 198  
1062 conserved proteins which represent the core of a set of 77 cyanobacterial genomes. We  
1063 provide the name of the protein and the aminoacid sequence.

1064



1065 **Additional file 2: Table S2.docs/Genomes used to obtain the core proteome.** List of  
1066 species and their larger classification used to obtain the core genome.

1067

1068 **Additional file 3: Table S3.xlsx/List of 470 isolated bacteria with their 16S rRNA.**

1069 We enlist all of the identified taxa isolated from the *t0* samples and identified with 16S  
1070 rRNA Sanger-sequencing.

1071

1072 **Additional file 4: Figure S1.pdf/Graphic representation of each group identified**

1073 **with 16S rRNA from isolates. A)** We generated individual phylogenies for each of the

1074 genera in our main tree and represented them graphically as shown here. **B)** We also

1075 show individual trees with support values. A full resolution of both figures as individual

1076 files is available at:

1077 [https://www.dropbox.com/sh/ss5mmwujnynyc7m/AABqABxc5wS\\_wjd8NzkarHTca?dl](https://www.dropbox.com/sh/ss5mmwujnynyc7m/AABqABxc5wS_wjd8NzkarHTca?dl)

1078 [=0](#).

1079

1080 **Additional file 5: Table S4.docx/ Biodiversity indices of 16S rRNA and OTUs.**

1081 Diversity indices estimated for samples from 16S rRNA data, and from the four

1082 metagenomes (MET) we sequenced. We calculated Shannon-Weaver  $H'$  (1962) and

1083 Simpson  $L$  (1964).

1084

1085 **Additional file 6: Table S5.docx/Statistics of metagenomes sequenced.**

1086 We provide detail on the sequencing depth, contigs, quality of contigs and other basic

1087 statistics on sequenced metagenomes.

1088

1089 **Additional file 7: Figure S2.jpg/ Pictures of cyanobacteria-centric co-cultures.** Co-  
1090 cultures in 1L flasks. In the insets is a close up of the culture, where a mucilaginous  
1091 biofilm mass can be observed, presumably polysaccharides generated by the  
1092 cyanobacteria.

1093

1094 **Additional file 8: Figure S3. Kraken-based taxonomic diversity of metagenomes.**

1095 Taxa abundance from the metagenome mOTUs defined as the percentage of the genera  
1096 present in each sample. Jiquipilas (JP) is the dry environment, while Raymundo Flores  
1097 (RF) individuals are found in the humid environment. JP or RFPOOL refers the samples  
1098 sequenced in pools from media No. 6.

1099

1100 **Additional file 9: Figure S4.pdf/ Rarefaction analysis of 16S rRNA and OTUs data.**

1101 Shown is the proportion of OTUs represented by sample, by type of culture and by  
1102 environment for each of the metagenomes sequenced, and a total of possible samples  
1103 (All samples) according to a rarefaction estimate.

1104

1105 **Additional file 10: Figure S5.pdf/Concatenated species-tree of cyanobacteria.**

1106 Complete phylogeny of the Nostocales using five molecular markers, RPOB, GyrB,  
1107 CPS, PheT and Tig. See text for technical details.

1108

1109 **Additional file 11: Table S6.docx/Prediction of BGCs on the genome of isolate**

1110 **106C.** Biosynthetic Gene Clusters predicted by antiSMASH on the genome of isolate  
1111 106C are enlisted, with their corresponding length in Kp.

1112

1113 **Additional file 12: Table S7.docx/106C-specific BGCs throughout Nostocales.** We

1114 show the presence or absence of the 18 BGCs found throughout the Nostocales, to

1115 emphasize their presence of only some of them in our samples.

1116

1117 **Additional file 13: Text S1.docx/ Predicted lantipeptide from *Dioon* cyanobionts.**

1118 We show the sequence corresponding to the lantipeptides from the unique BGCs, whose

1119 prediction could not be fully shown in the main figures.

1120

1121 Any additional datasets used and/or analyzed during the current study available from

1122 the corresponding author on reasonable request.

1123

1124 **Competing interests**

1125 The authors declare that they have no competing interests.

1126 **Funding**

1127 Funding from this work is from CONACyT #169701 to ACJ, CONACyT #179290 and

1128 #177568 to FBG.

1129

1130 **Authors' contributions**

1131 PC-M executed laboratory work, analyzed and interpreted data, and was a major

1132 contributor in writing the manuscript. AC-M executed laboratory work and analyzed

1133 data. NSM analyzed data. MAP-F identified and collected the plants. AC-J and FB-G

1134 equally co-designed and executed the study. AC-J was the main contributor in writing

1135 the manuscript. FB-G revised the manuscript critically for intellectual content. All

1136 authors read and approved the final manuscript.

1137

## 1138 **Acknowledgements**

1139 We acknowledge Rafael Rincón for his help with preparation of supplementary  
1140 material. We also thank Juan Palacios, Pablo Suarez-Moo and Antonio Hernández for  
1141 help during field collections, as well as Hilda E. Ramos-Abiotes and Flor Zamudio for  
1142 technical support.

1143

## 1144 **Authors' information**

1145 PC-M is a biochemist with a PhD in plant biotechnology. He is focused on the  
1146 evolutionary mechanisms behind the chemical diversity of bacterial metabolism and the  
1147 effect of natural selection upon chemical structures and biosynthetic pathways of NPs.  
1148 He strongly believes that integrative biology approaches will have a direct impact on the  
1149 discovery of novel molecules.

1150

1151 AC-G is a biologist specializing in the field of bioinformatics, with a master's degree in  
1152 biotechnology in plants dedicated to the study of microbiota of plants.

1153

1154 NSM is a mathematician by training. She is currently in the last year of her PhD in  
1155 Integrative Biology, studying the relationship between genome dynamics and enzyme  
1156 promiscuity. Her aim is to develop new approaches with predictive power for functional  
1157 annotation of enzymes and metabolic pathways.

1158

1159 MAPF is a biology, researcher and professor of Herbarium Eizi Matuda and  
1160 Evolutionary ecology laboratory in the Universidad de Ciencias y Artes de Chiapas. He

1161 is studying the biology, systematics and ecology of Mexican cycads and palms, and the  
1162 analysis of communities of plants in the tropical region of Mexico.

1163

1164 FB-G is a chemist with interest in the evolutionary and mechanistic aspects that allowed  
1165 for the appearance of bacterial metabolism from a phylogenomics perspective. He runs  
1166 a concept-driven multi- and inter-disciplinary research program that integrates different  
1167 scales and types of data. <http://www.langebio.cinvestav.mx/?pag=120>

1168

1169 AC-J is an evolutionary biologist with specialization in plant population genetics and  
1170 phylogenomics. She is interested in integrating multiple disciplines to understand the  
1171 adaptive value of microbiomes in plant ecological and evolutionary history, in cycads in  
1172 particular. <http://www.langebio.cinvestav.mx/?pag=426>.

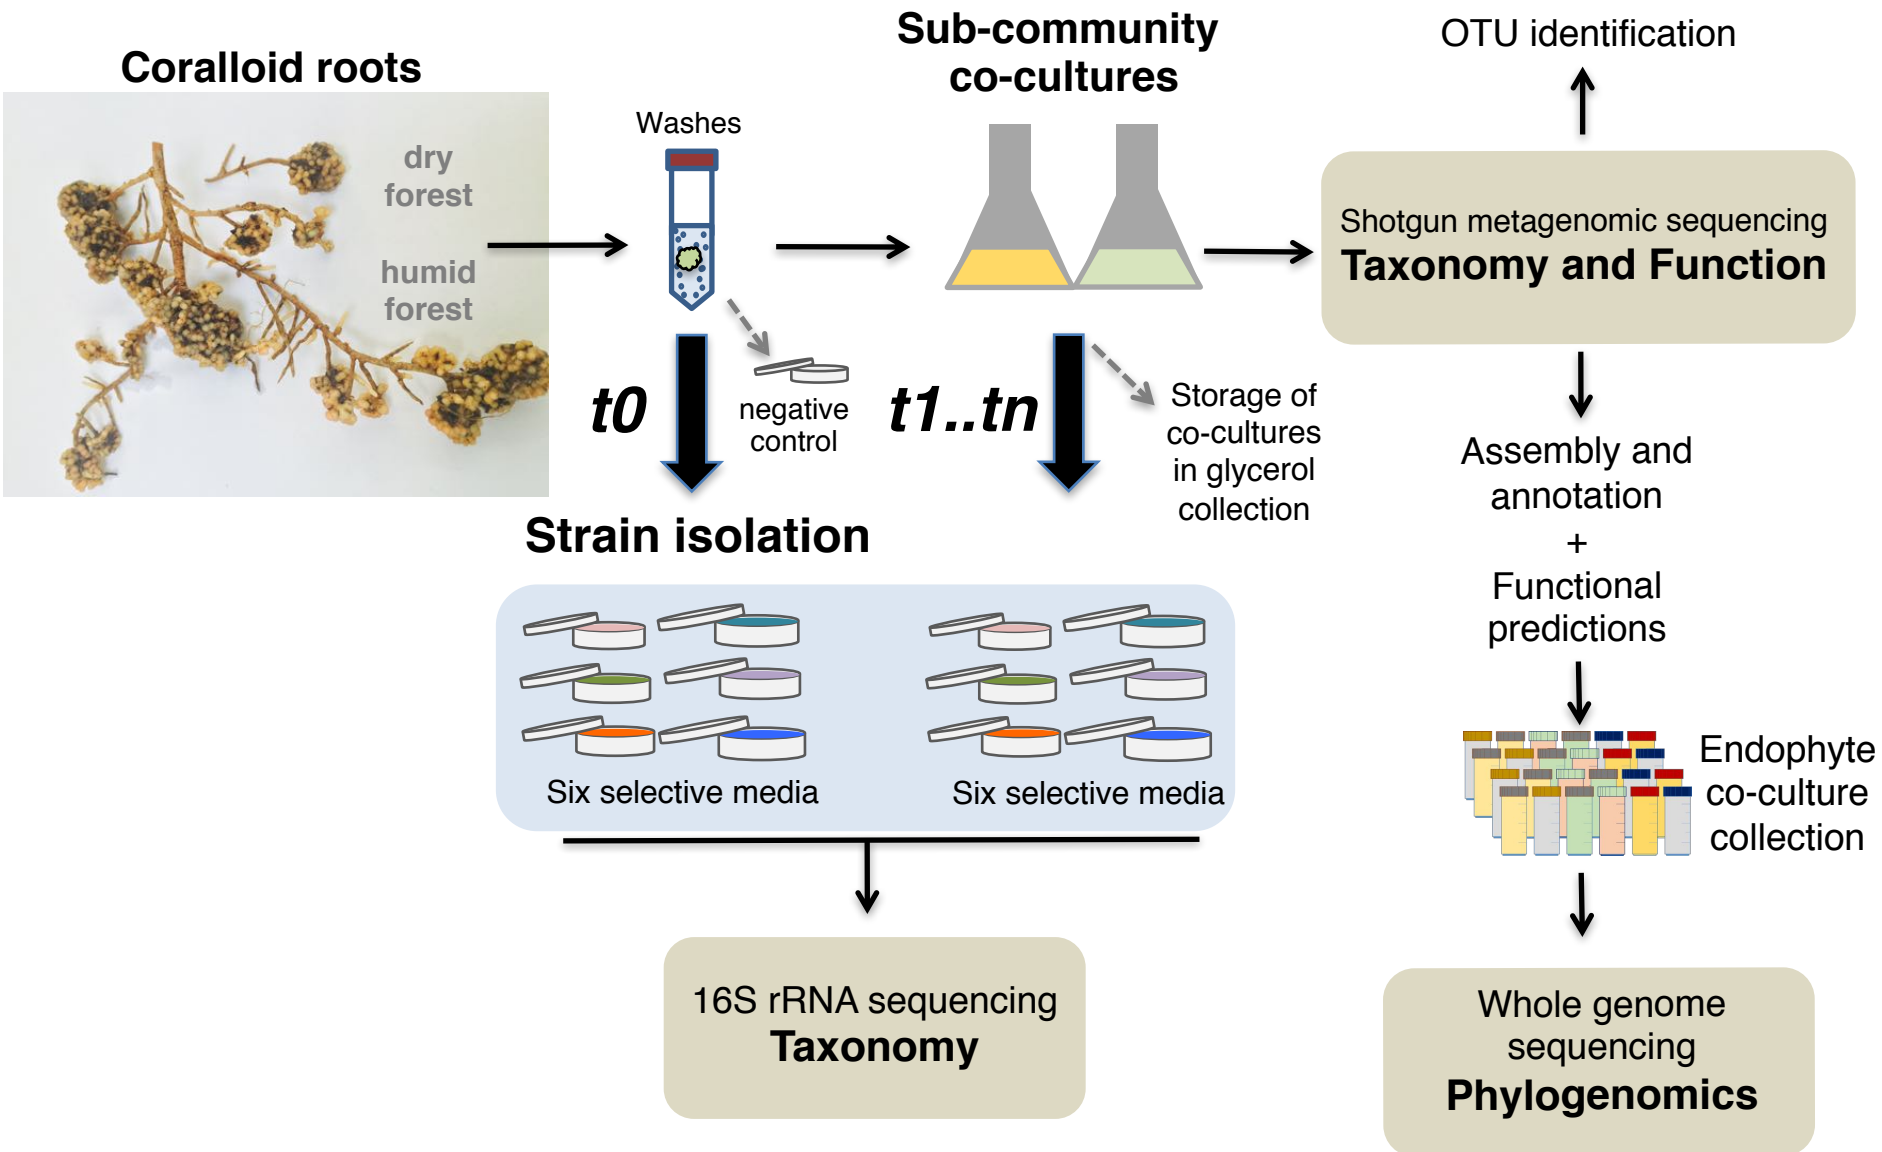

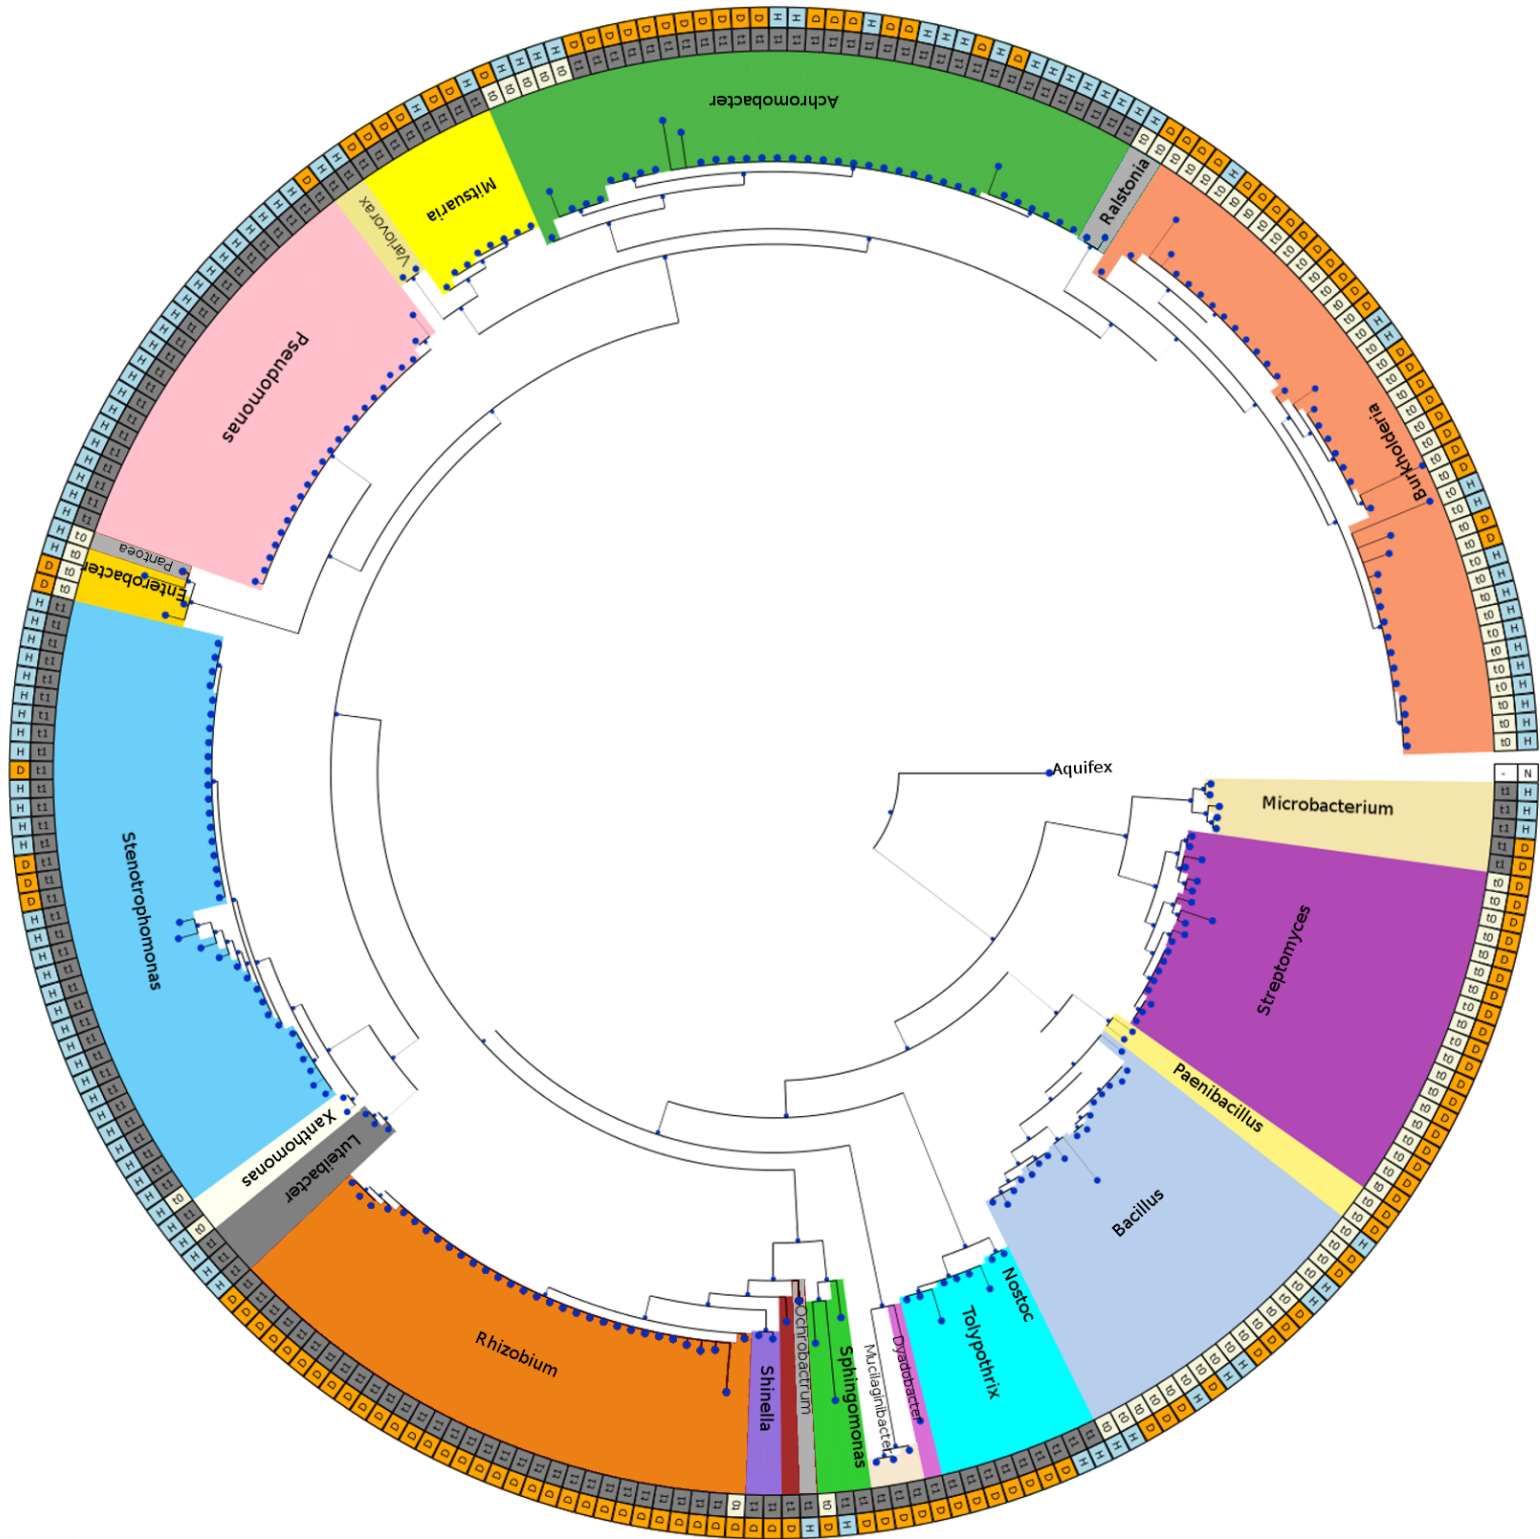

0.25

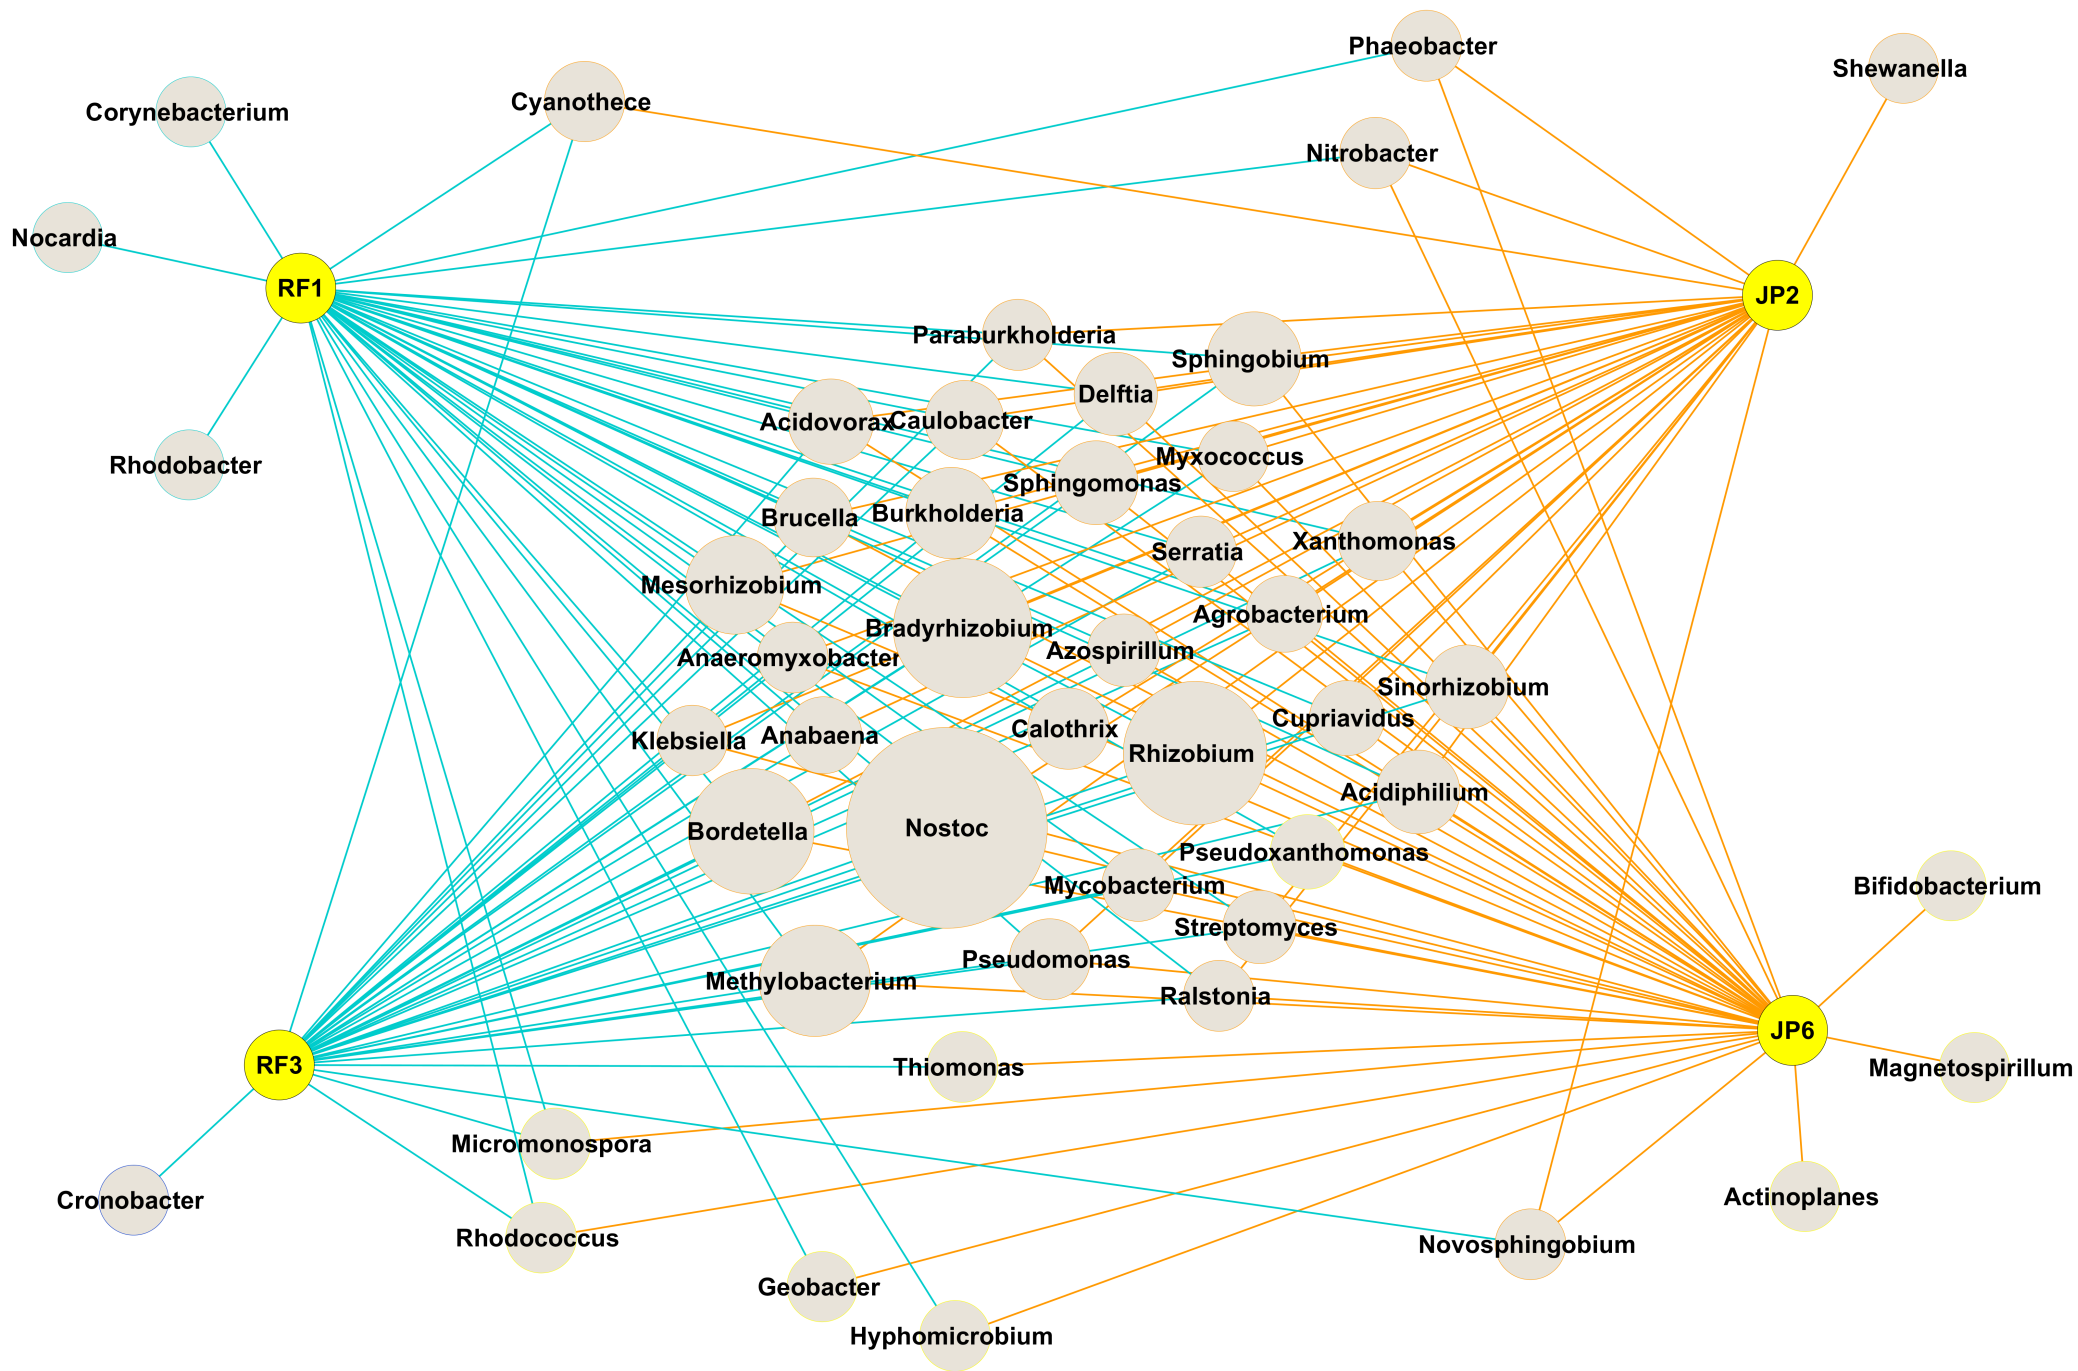



**A**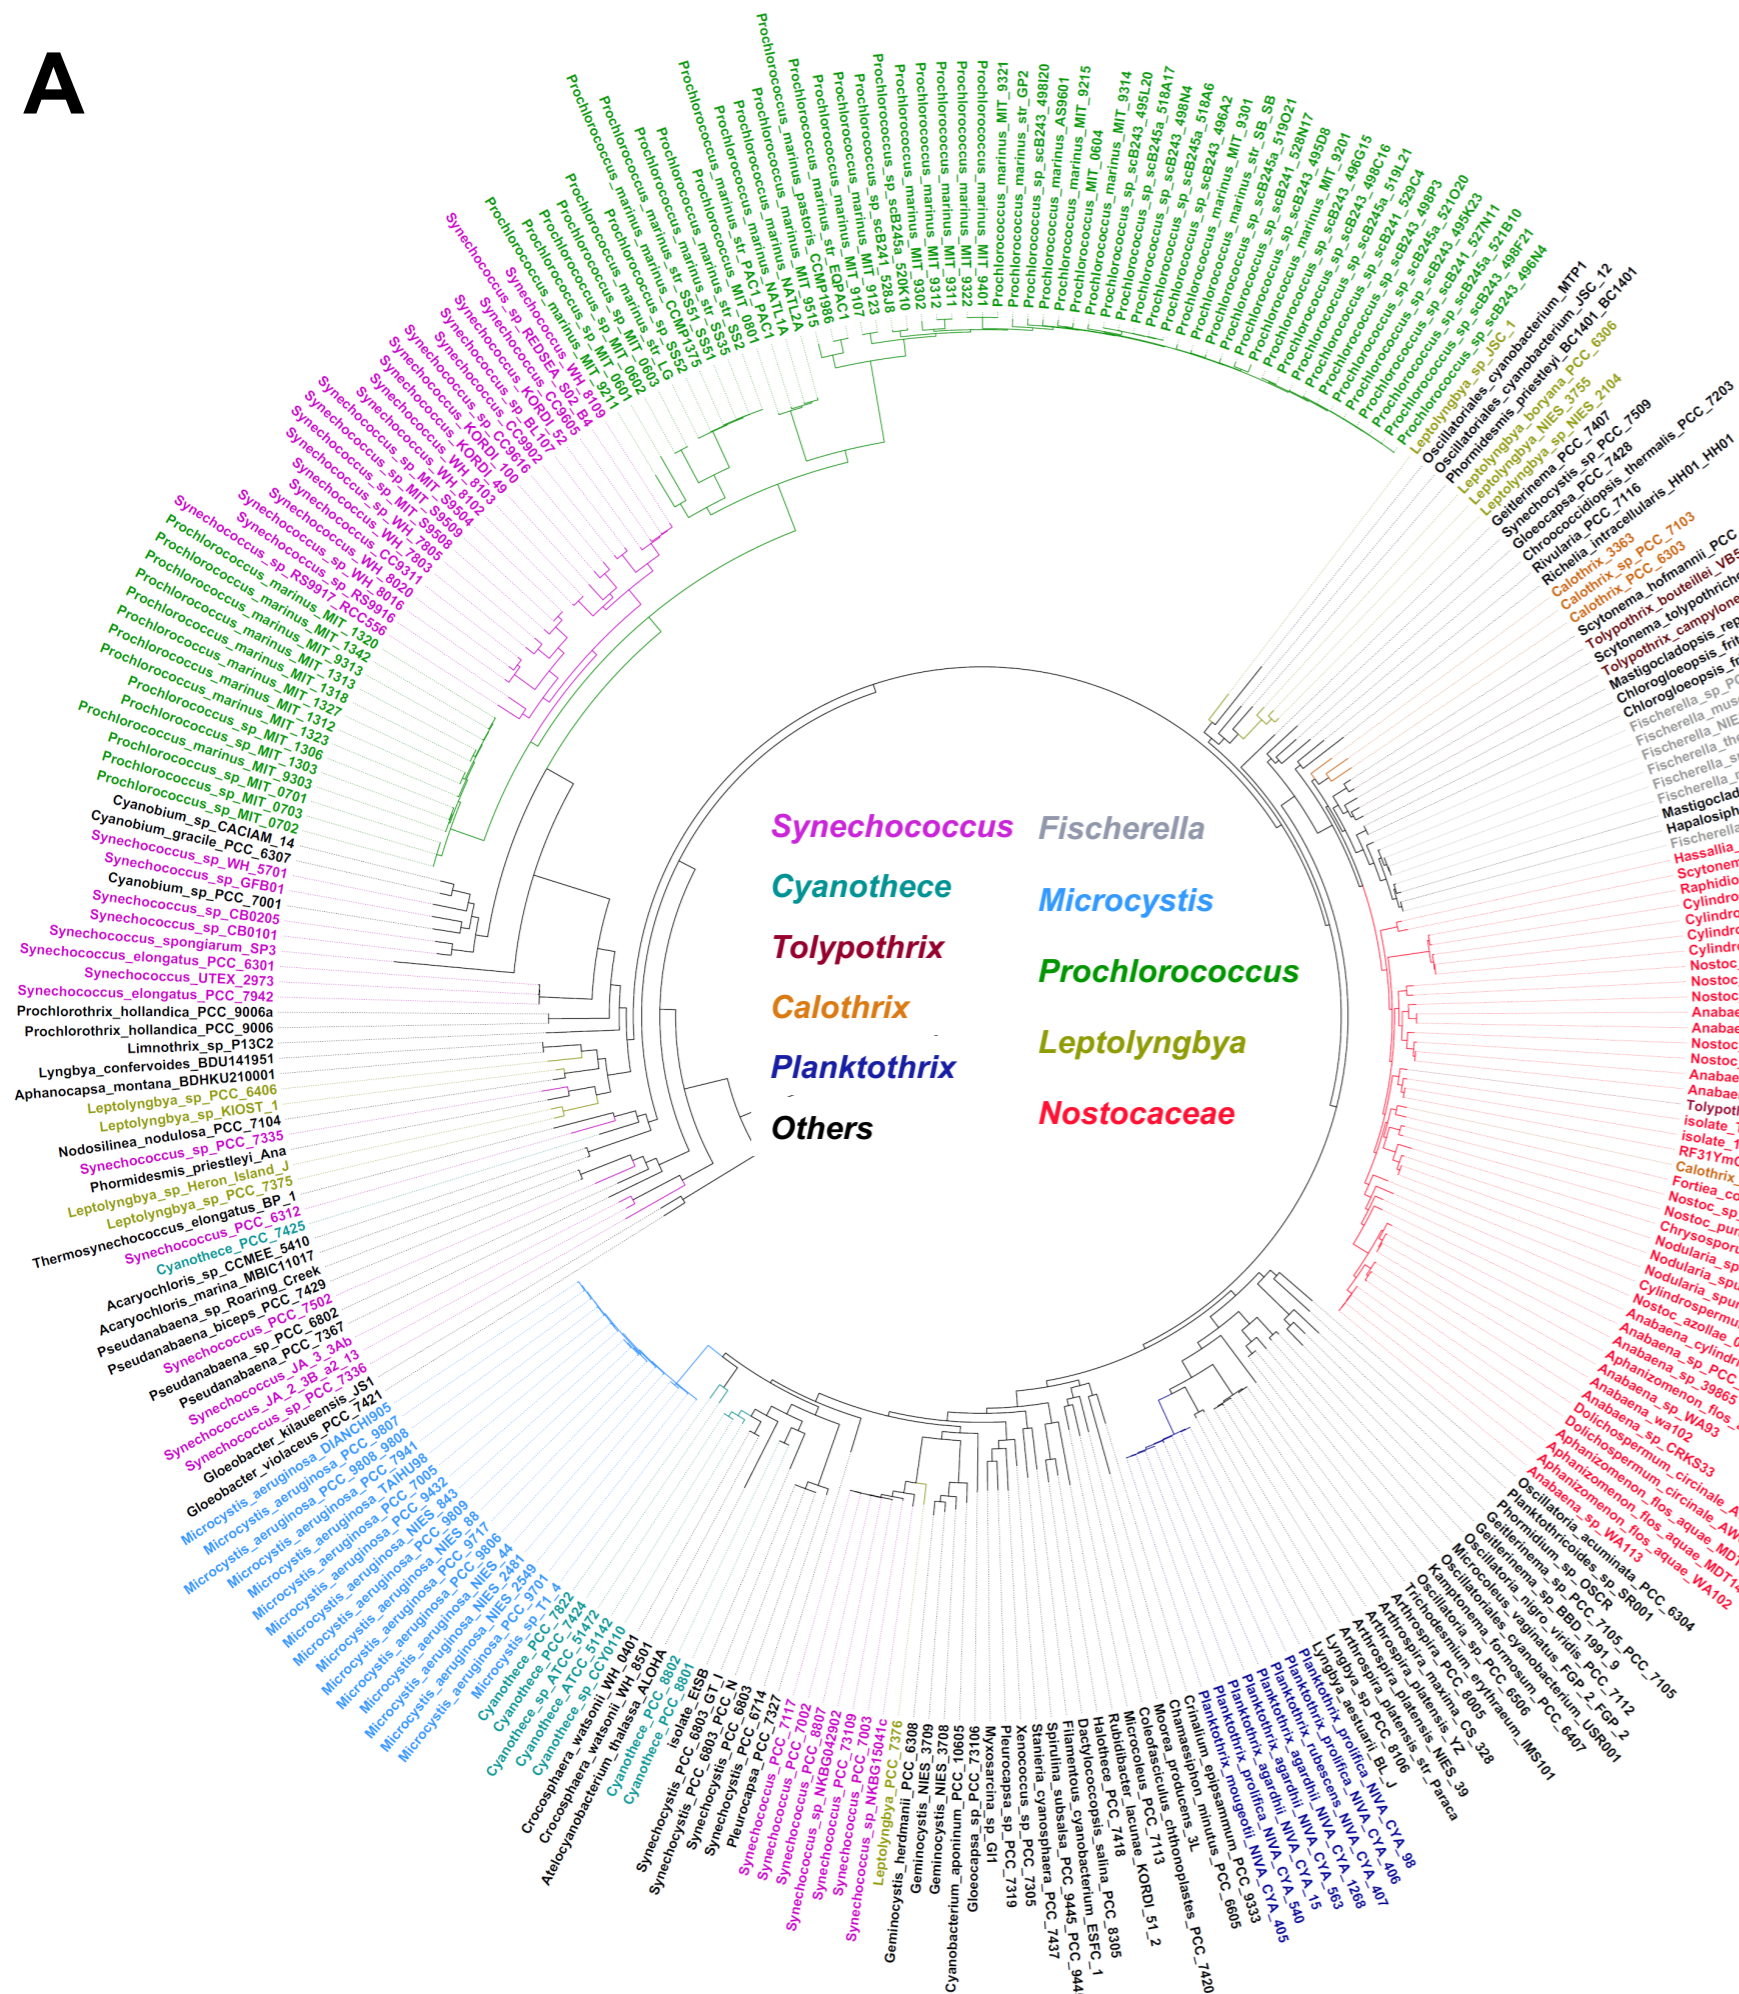**B**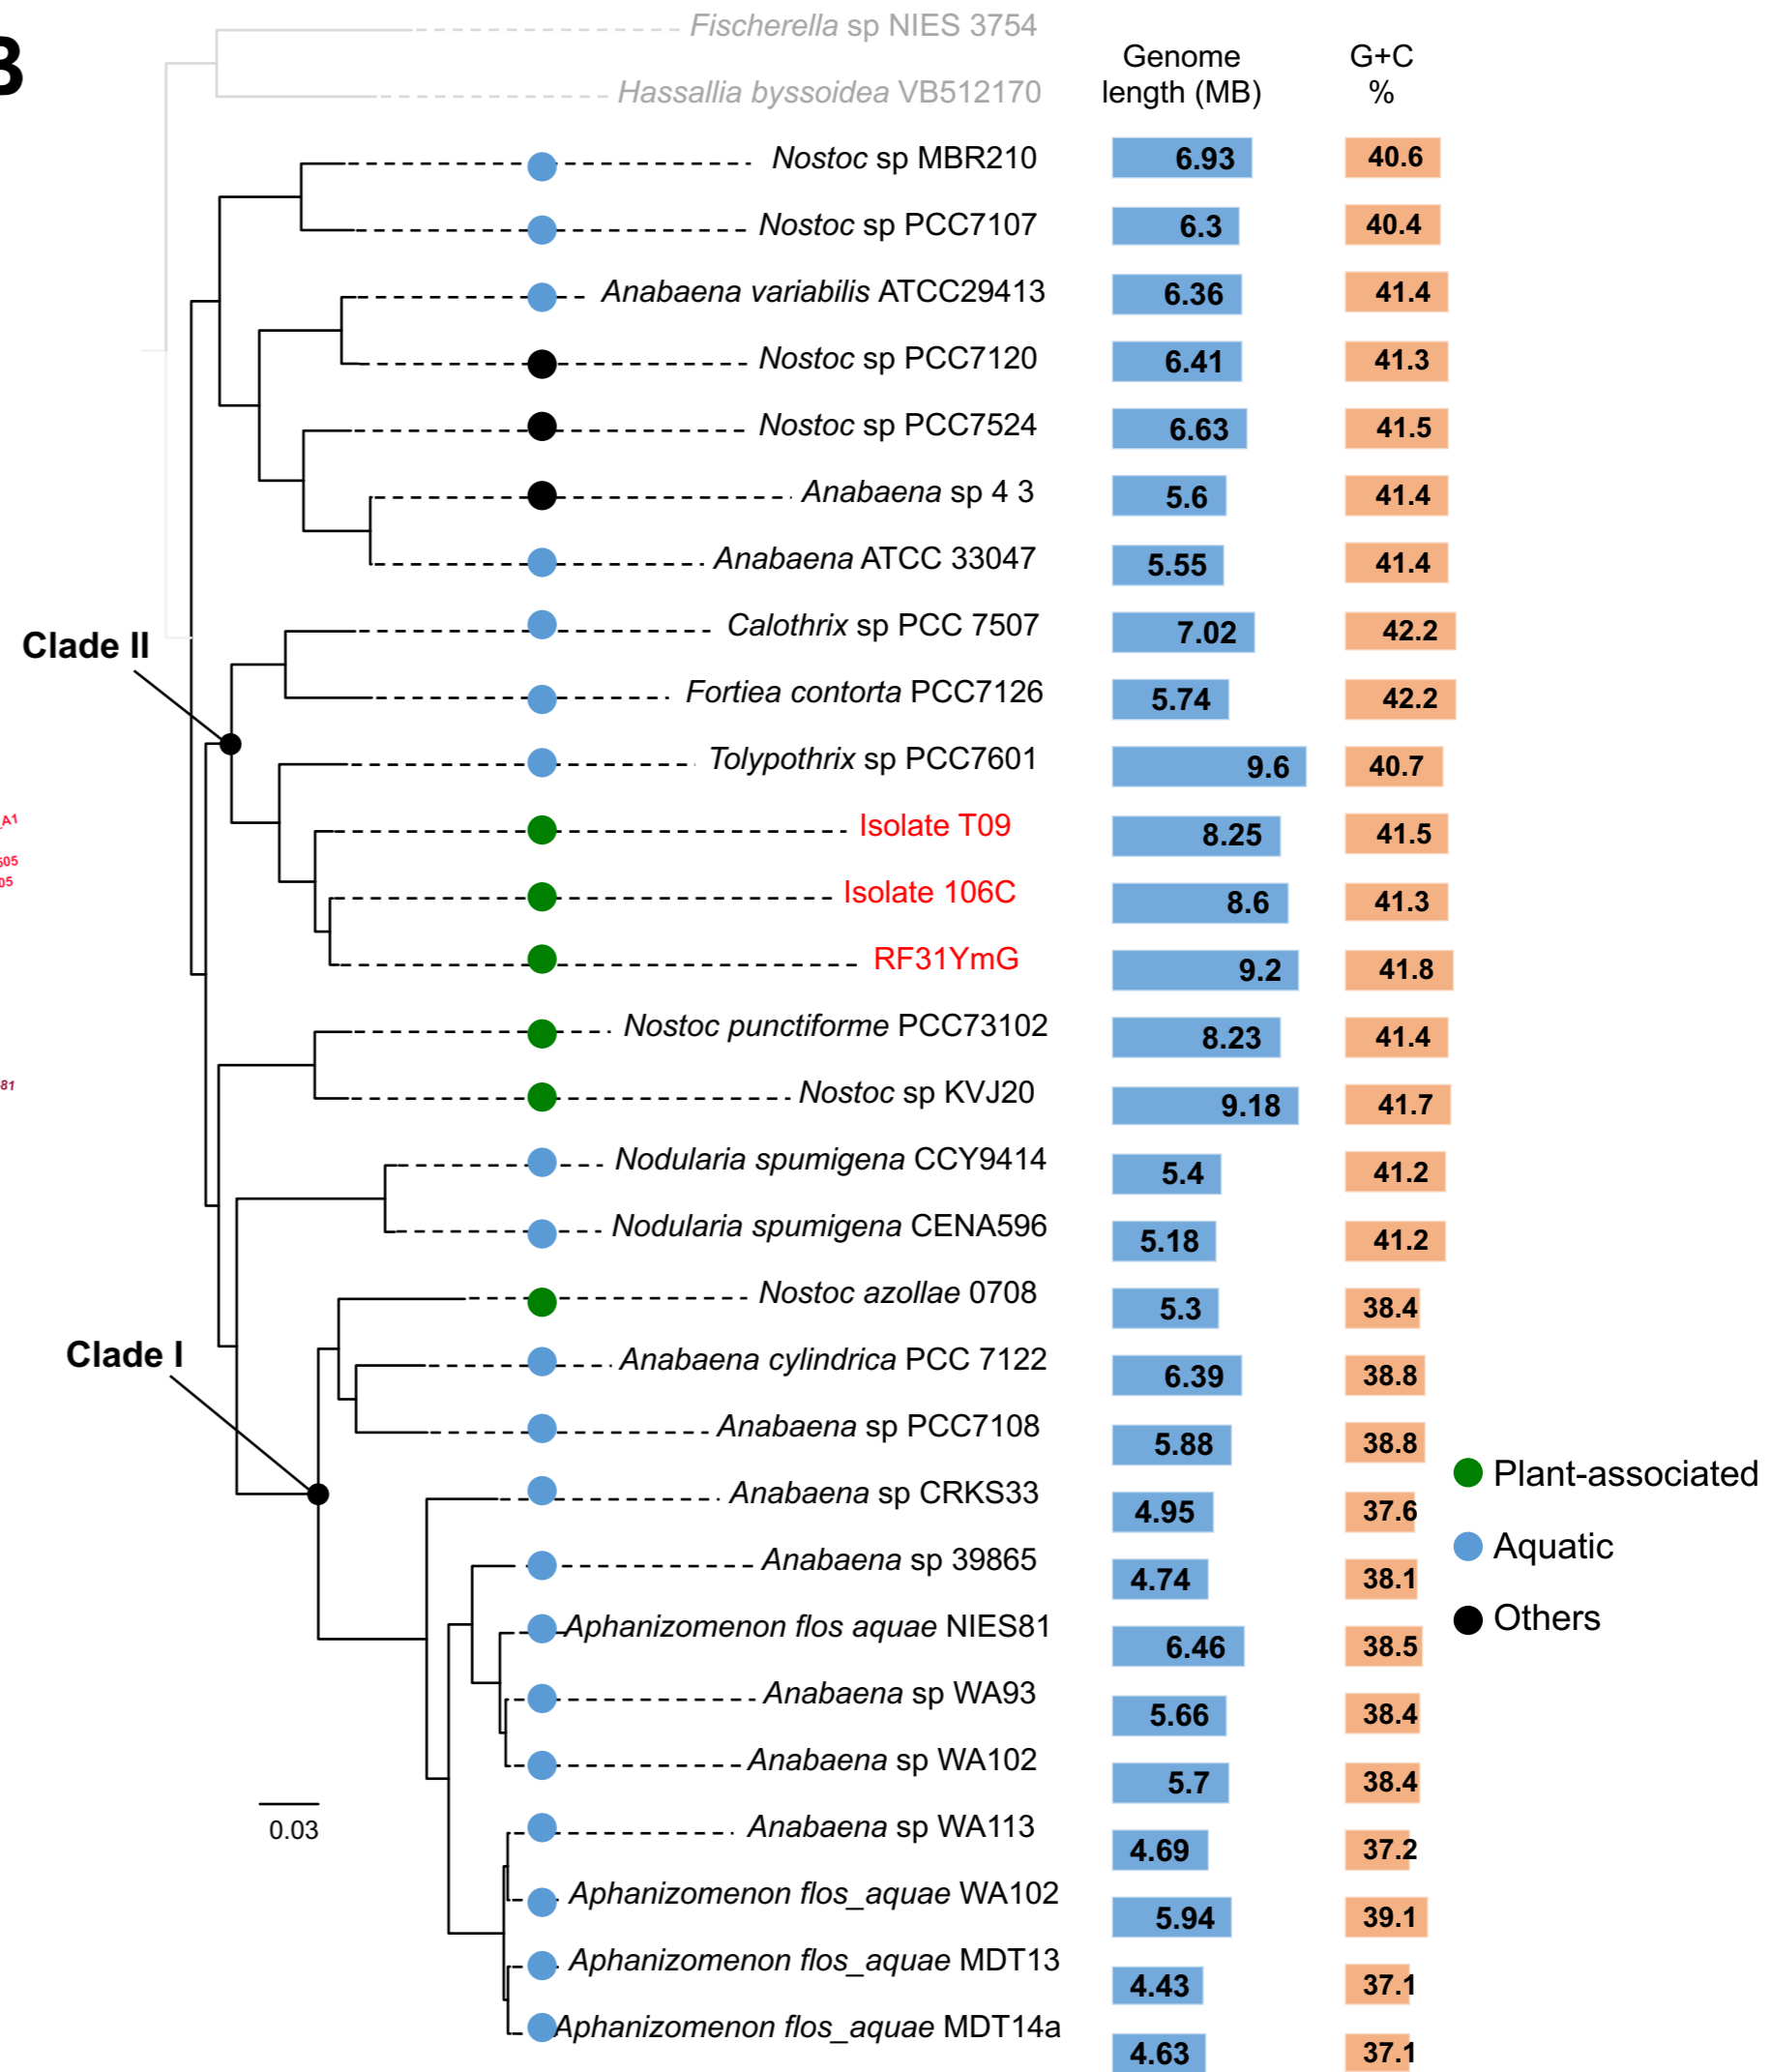

**BGC 1**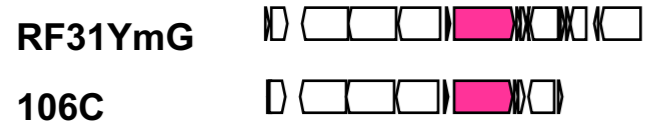**BGC 9**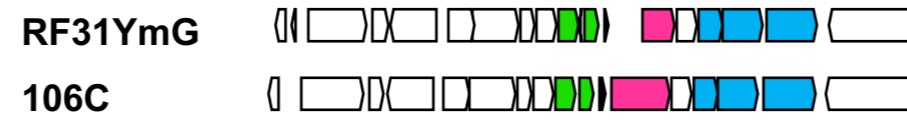

- Lanthionine synthetase C
- Lantipeptide precursor
- Peptide synthetase
- Ribosomal protein acetyl-transferase
- Regulatory protein
- Phytochrome-like protein
- 2-hydroxy-3-oxipropionate reductase
- Aminotransferase
- Chemotaxis proteins
- Transport gene
- Peptidase
- Hemmagglutinin-related proteins
- Iron metabolism related
- Dioxygenase TauD/TfdA
- Short chain dehydrogenase
- Others

**BGC 10**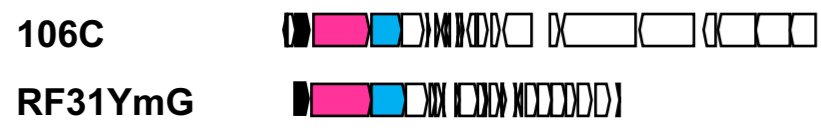**BGC 17**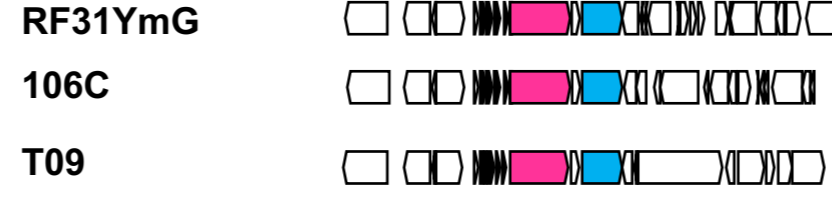**BGC 12**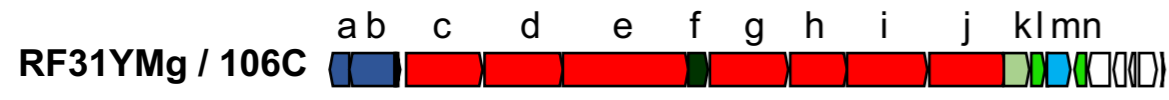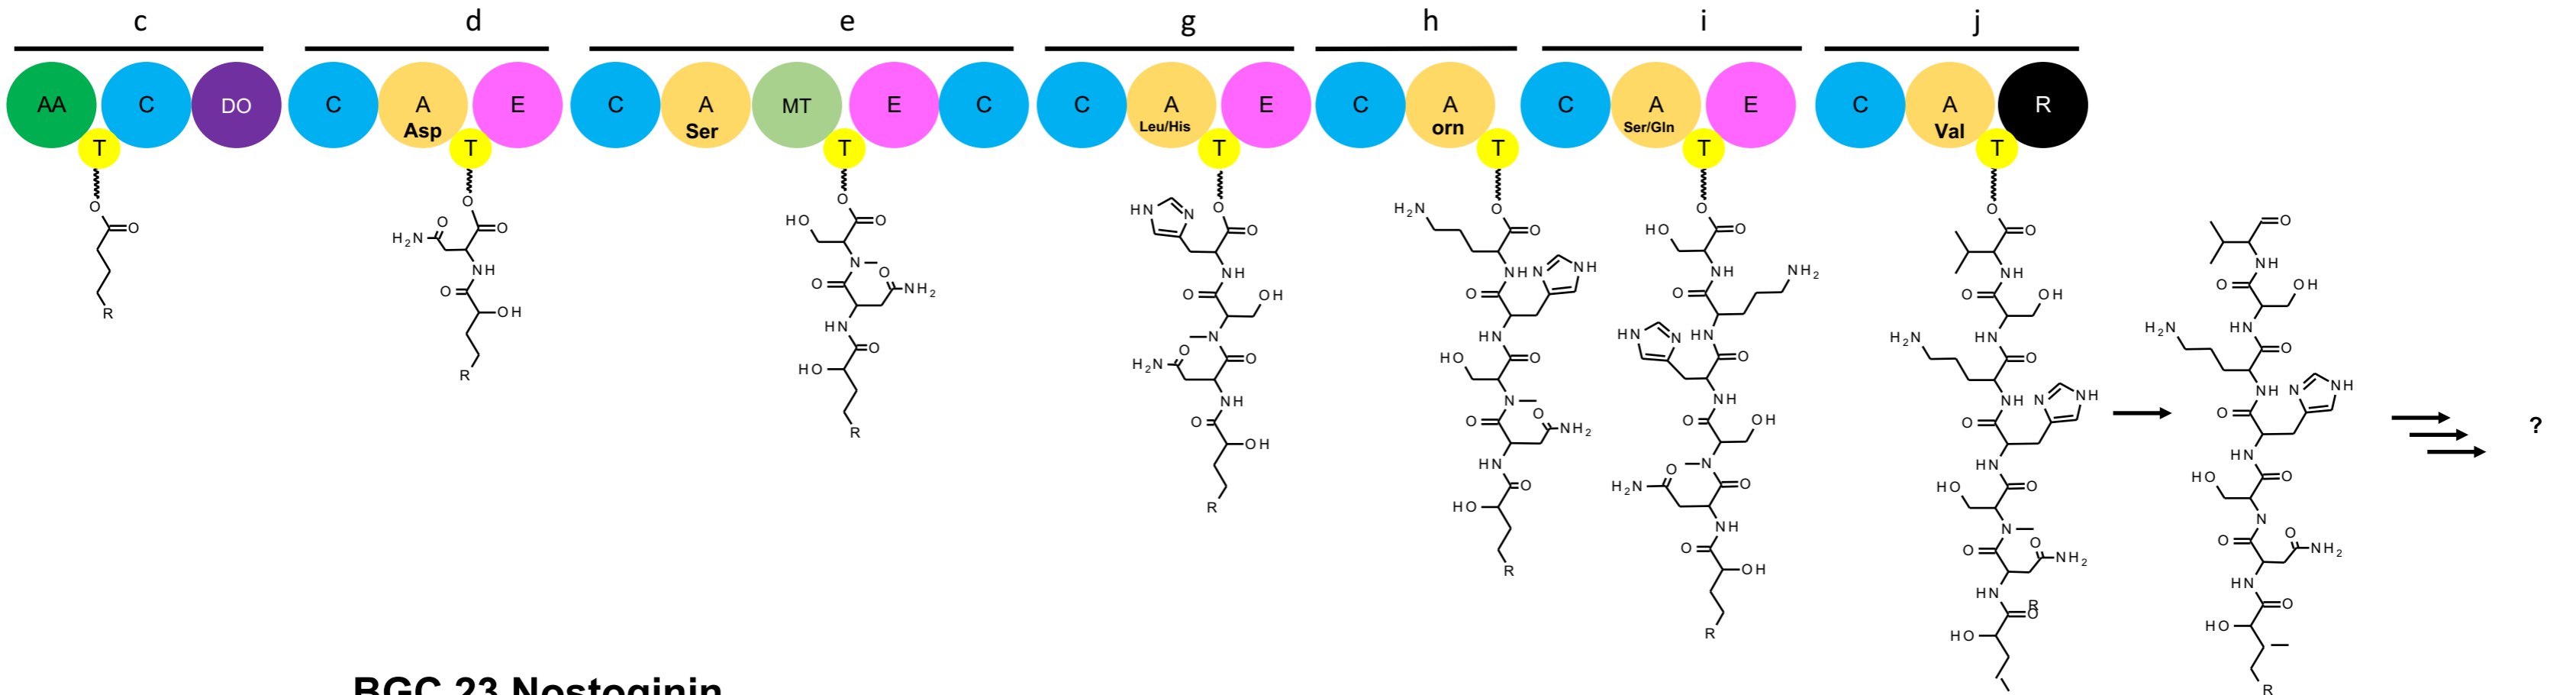**BGC 23 Nostoginin**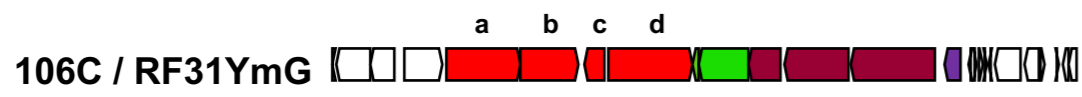**T09**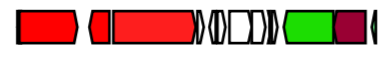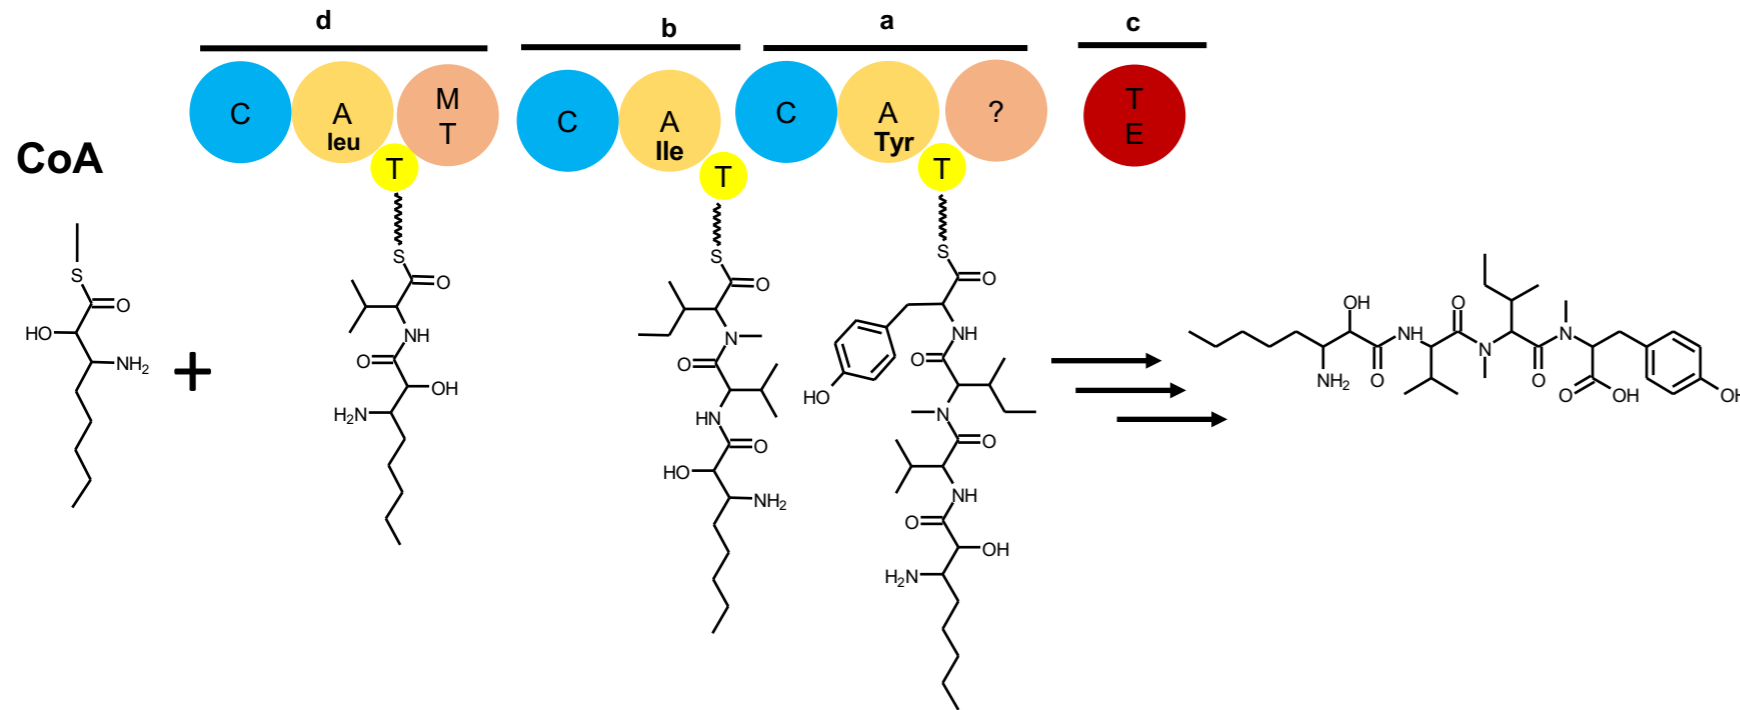**BGC 22**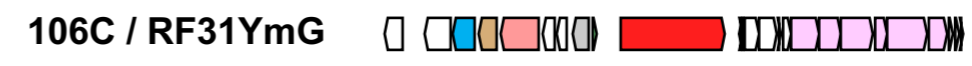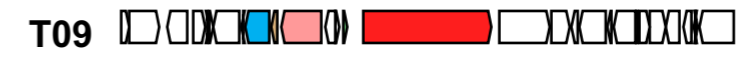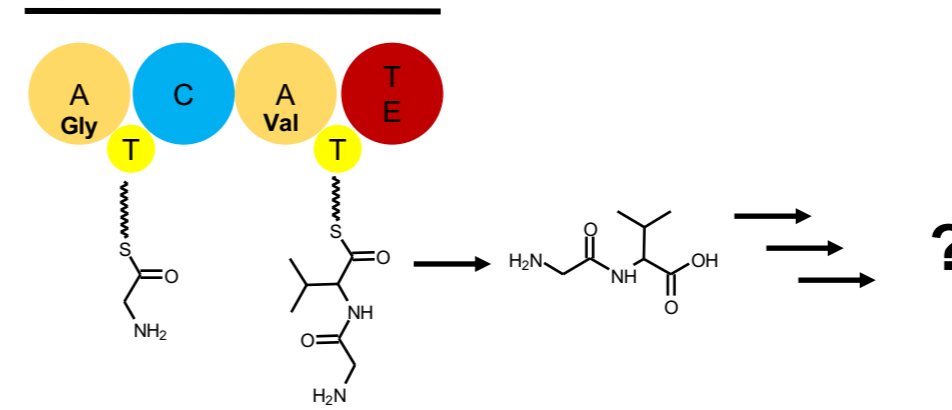**BGC 20**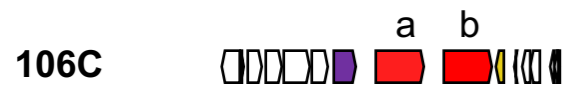**BGC 21**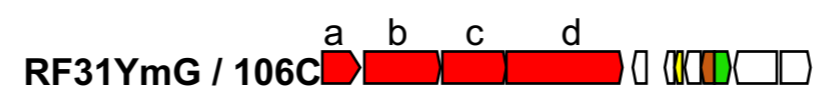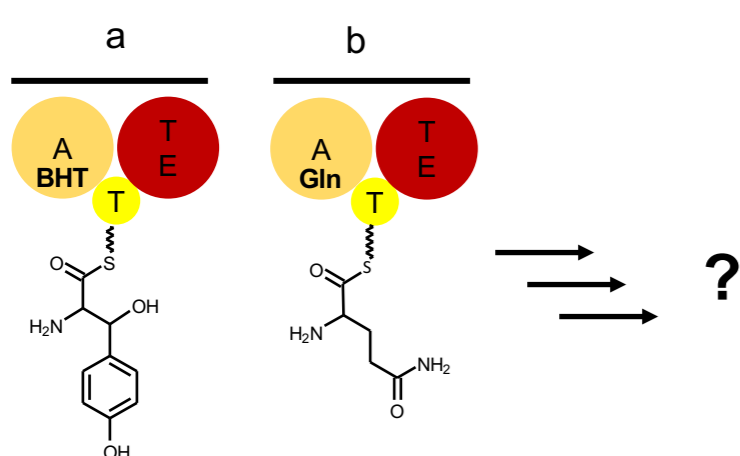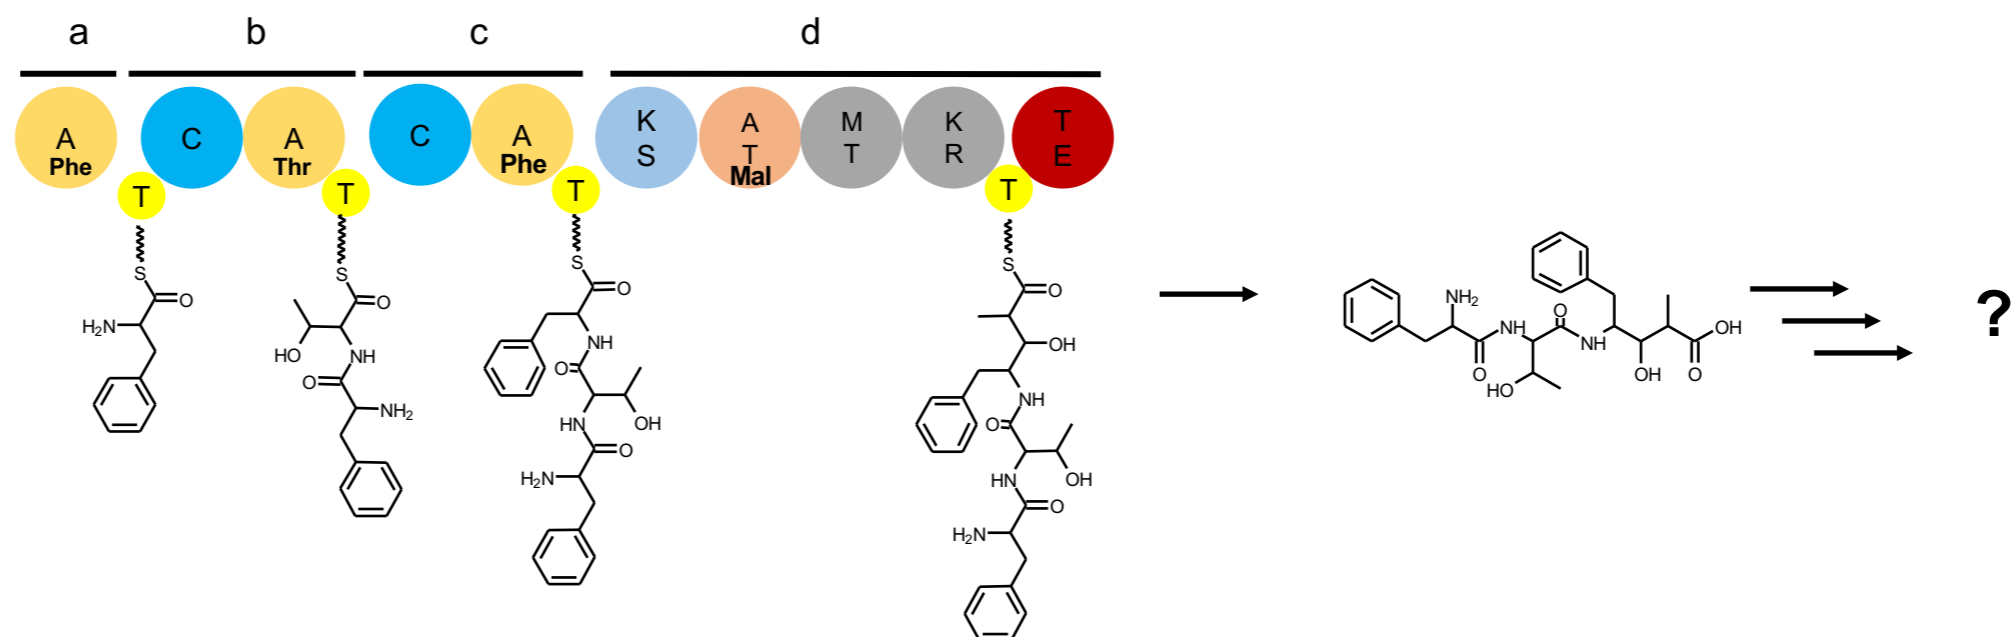

Source: http://www.biorxiv.org/content/10.1101/121160v2.full.pdf
